# Supplementary material for: Localized-Statistical Quantification of Human Serum Proteome Associated with Type 2 Diabetes
Source: PubMed Central journal article supplement (PMC2529402; doi:10.1371/journal.pone.0003224), 2008-09-16

**Supplementary Figure S1. The distribution of proteins and peptides identified in 42 gel slices of non-diabetic serum and diabetic serum.**

**A**

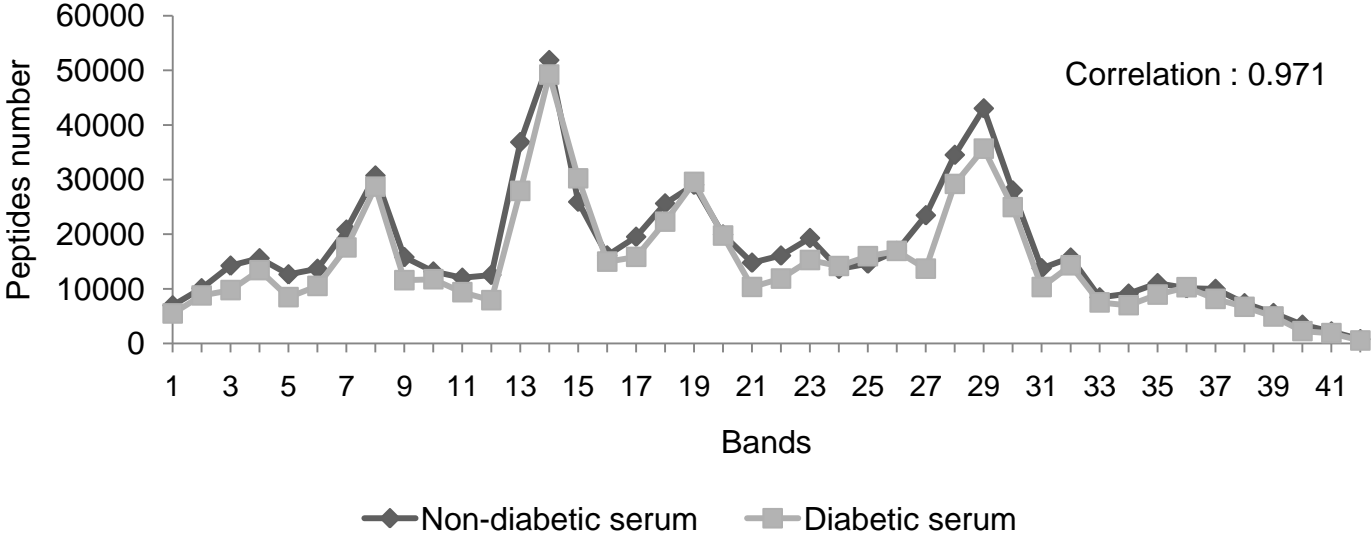

**B**

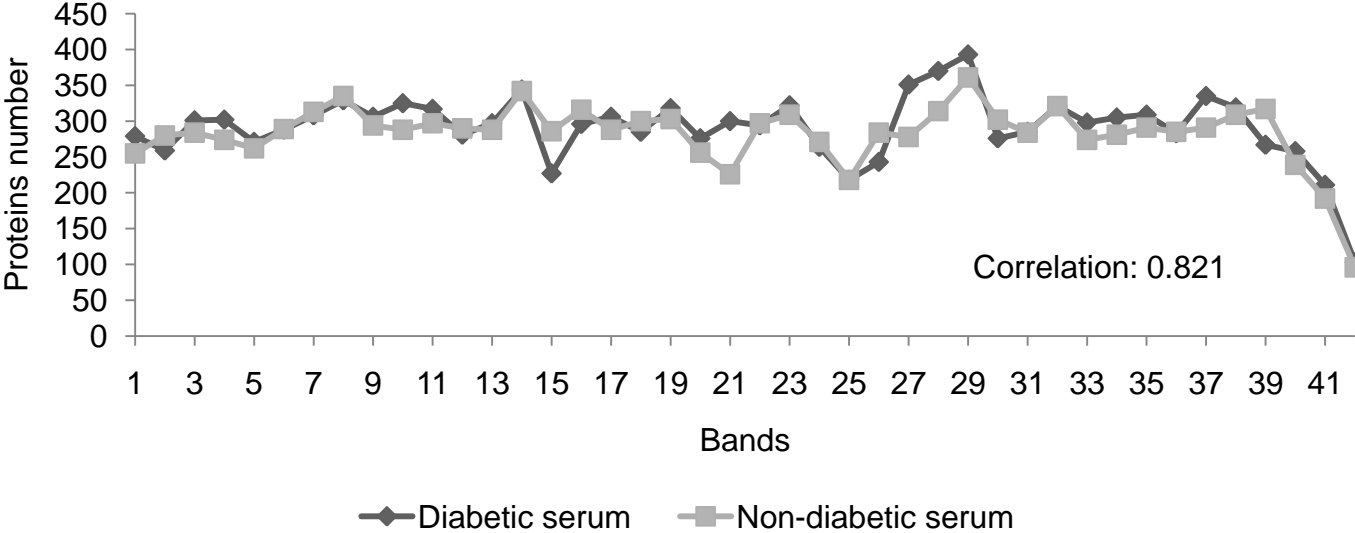

Supplement: pone.0003224.s001.pdf [file pone.0003224.s001.pdf]
