# Supplementary material for: Localized-Statistical Quantification of Human Serum Proteome Associated with Type 2 Diabetes
Source: PubMed Central journal article supplement (PMC2529402; doi:10.1371/journal.pone.0003224), 2008-09-16

**Supplementary Figure S5. Western blot analyses of the serum ficolin3 level in the non-diabetic subjects (n = 24) and diabetic patients (n = 24). “Con” represents the control serum sample from a diabetic patient; “N” represents non-diabetic subjects; “D” represents diabetic patients.**

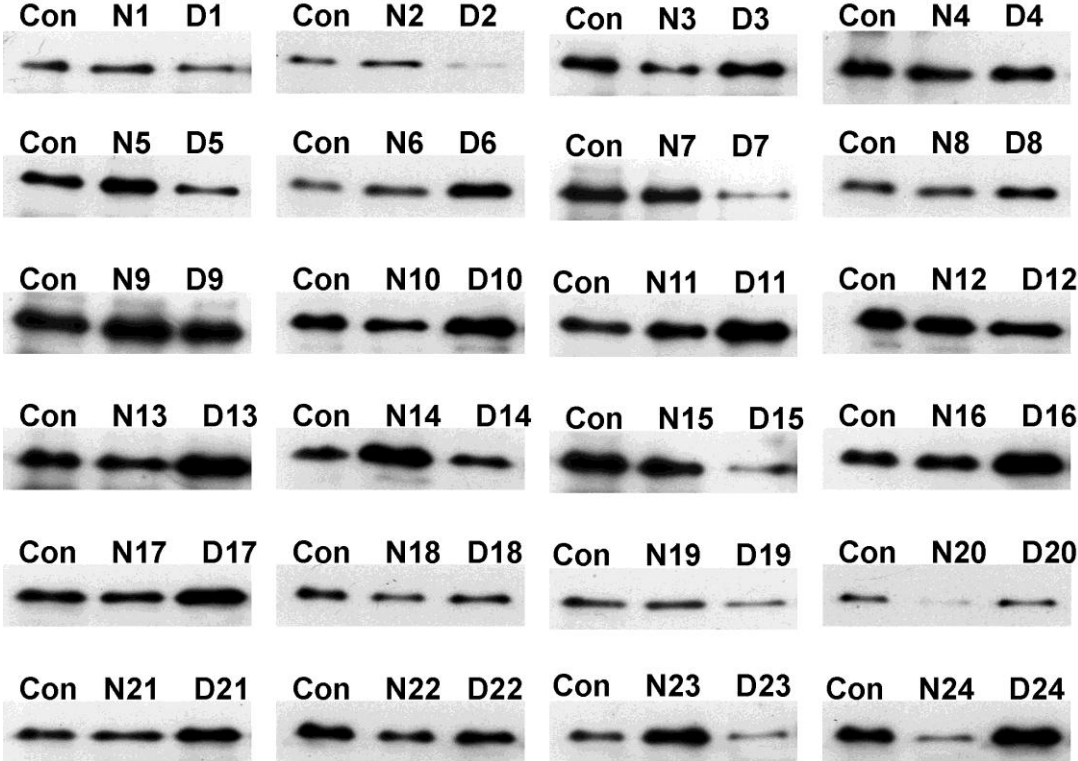

Supplement: pone.0003224.s005.pdf [file pone.0003224.s005.pdf]
