# Supplementary material for: Localized-Statistical Quantification of Human Serum Proteome Associated with Type 2 Diabetes
Source: PubMed Central journal article supplement (PMC2529402; doi:10.1371/journal.pone.0003224), 2008-09-16
Supplement: pone.0003224.s006.pdf [file pone.0003224.s006.pdf]

## Supplementary Table S1

**Baseline characteristics of five non-diabetic subjects and five diabetic patients.** WT: weight (kg), FPG: fasting plasma glucose (mmol/L), PG2H: 2-hour plasma glucose (mmol/L), BMI: Body Mass Index, HbA1c: glycosylated hemoglobin (%); HOMA: The Homeostasis Model Assessment

| Diabetic patients     | AGE | WT   | FPG | PG2H | BMI   | HOMA  | HbA1c | C-Peptide | With diabetes history |
|-----------------------|-----|------|-----|------|-------|-------|-------|-----------|-----------------------|
| 1                     | 66  | 62.5 | 12  | N.A  | 22.41 | 5.49  | 7.1   | 1.8       | Yes                   |
| 2                     | 68  | 93   | 6.7 | 13.6 | 33.95 | 12.05 | 7.8   | 5.45      | No                    |
| 3                     | 68  | 78.5 | 6.1 | 11.6 | 26.85 | 5.96  | 6.9   | 3.24      | No                    |
| 4                     | 65  | 74.5 | 5   | 11.4 | 26.08 | 3.11  | 7.2   | 3.12      | No                    |
| 5                     | 68  | 79.4 | 6.5 | N.A  | 25.87 | 1.75  | 6.7   | 3.57      | Yes                   |
| Non-diabetic subjects | AGE | WT   | FPG | PG2H | BMI   | HOMA  | HbA1c | C-Peptide |                       |
| 1                     | 69  | 68   | 5.1 | 6    | 22.41 | 2.12  | 6.1   | 1.38      | N.A                   |
| 2                     | 65  | 59.5 | 4.9 | 2.5  | 20.83 | 1.24  | 5.2   | 1.27      | N.A                   |
| 3                     | 69  | 62   | 4.8 | 6.1  | 21.58 | 0.85  | 5     | 1.14      | N.A                   |
| 4                     | 68  | 57.2 | 4.5 | 5.4  | 22.59 | 0.62  | 6     | 0.89      | N.A                   |
| 5                     | 67  | 57.7 | 4.8 | 3.9  | 20.94 | 0.4   | 6.1   | 0.78      | N.A                   |
