# Supplementary material for: Localized-Statistical Quantification of Human Serum Proteome Associated with Type 2 Diabetes
Source: PubMed Central journal article supplement (PMC2529402; doi:10.1371/journal.pone.0003224), 2008-09-16
Supplement: pone.0003224.s007.pdf [file pone.0003224.s007.pdf]

## Supplementary Table S2

**Proteins identified by two or more peptide spectral counts in non-diabetic and diabetic serum.** P value: statistically difference of protein identified in non-diabetic serum and diabetic serum were test by the computing method of Localized Statistics of Protein Abundance Distribution (LSPAD).

| <b>IPI ID</b> | <b>Protein name</b>                       | <b>Peptide spectral count identified<br/>in diabetic serum</b> | <b>Peptide spectral count<br/>identified in non-diabetic serum</b> | <b>P value</b> |
|---------------|-------------------------------------------|----------------------------------------------------------------|--------------------------------------------------------------------|----------------|
| IPI00022434   | ALB protein                               | 61457                                                          | 47082                                                              | 4.09E-91       |
| IPI00514824   | Complement component C4B                  | 875                                                            | 183                                                                | 1.44E-80       |
| IPI00555805   | Complement component 4A                   | 3896                                                           | 2109                                                               | 1.63E-69       |
| IPI00032258   | Complement C4 precursor                   | 3846                                                           | 2077                                                               | 3.06E-69       |
| IPI00453459   | Complement Component 4B preproprotein     | 3933                                                           | 2141                                                               | 9.77E-69       |
| IPI00418163   | C4B1                                      | 3811                                                           | 2077                                                               | 2.48E-66       |
| IPI00384697   | ALB protein                               | 47105                                                          | 37323                                                              | 6.64E-37       |
| IPI00556148   | Complement factor H                       | 2732                                                           | 1691                                                               | 1.30E-30       |
| IPI00465313   | Alpha 2 macroglobulin variant             | 17016                                                          | 13013                                                              | 7.50E-26       |
| IPI00478003   | Alpha-2-macroglobulin precursor           | 17344                                                          | 13335                                                              | 3.06E-24       |
| IPI00385264   | Ig mu heavy chain disease protein         | 1614                                                           | 880                                                                | 4.42E-23       |
| IPI00164623   | Complement C3 precursor                   | 9754                                                           | 7267                                                               | 8.64E-22       |
| IPI00479708   | Immunoglobulin heavy constant mu (IGHM)   | 2007                                                           | 1204                                                               | 1.02E-21       |
| IPI00549273   | Immunoglobulin heavy constant mu (IGHM)   | 1995                                                           | 1190                                                               | 3.09E-21       |
| IPI00019943   | Afamin precursor                          | 553                                                            | 221                                                                | 1.57E-20       |
| IPI00479169   | 65 kDa protein                            | 1932                                                           | 1181                                                               | 2.35E-18       |
| IPI00022488   | Hemopexin precursor                       | 1952                                                           | 1268                                                               | 2.99E-14       |
| IPI00426051   | Hypothetical protein DKFZp686C15213       | 5203                                                           | 3835                                                               | 6.18E-14       |
| IPI00021727   | C4b-binding protein alpha chain precursor | 638                                                            | 321                                                                | 1.01E-13       |
| IPI00478493   | Haptoglobin precursor                     | 4214                                                           | 3100                                                               | 7.28E-12       |

|             |                                                 |      |      |          |
|-------------|-------------------------------------------------|------|------|----------|
| IPI00550991 | Alpha-1-antichymotrypsin precursor              | 1088 | 628  | 2.99E-11 |
| IPI00019591 | Splice Isoform 1 of Complement factor B         | 1183 | 696  | 4.42E-11 |
| IPI00021842 | Apolipoprotein E precursor                      | 394  | 181  | 3.28E-10 |
| IPI00019399 | Serum amyloid A-4 protein precursor             | 143  | 43   | 9.21E-10 |
| IPI00021857 | Apolipoprotein C-III precursor                  | 144  | 49   | 3.87E-08 |
| IPI00022392 | Complement C1q subcomponent, A chain precursor  | 103  | 30   | 1.25E-07 |
| IPI00021841 | Apolipoprotein A-I precursor                    | 4069 | 3112 | 2.14E-07 |
| IPI00010865 | Casein kinase II beta subunit                   | 23   | 0    | 2.70E-07 |
| IPI00396929 | PREDICTED: similar to immunoglobulin M chain    | 165  | 68   | 1.55E-06 |
| IPI00410714 | Alpha 2 globin variant                          | 433  | 244  | 3.33E-06 |
| IPI00163446 | The Human Immunoglobulin Heavy Diversity (IGHD) | 134  | 53   | 4.03E-06 |
| IPI00171834 | Keratin, type I cytoskeletal 19                 | 140  | 57   | 1.29E-05 |
| IPI00399007 | Hypothetical protein DKFZp686I04196             | 5114 | 4039 | 1.41E-05 |
| IPI00003590 | Quiescin Q6                                     | 15   | 0    | 4.53E-05 |
| IPI00022389 | Splice Isoform 1 of C-reactive protein          | 15   | 0    | 4.53E-05 |
| IPI00015309 | Keratin, type I cytoskeletal 12                 | 89   | 33   | 7.63E-05 |
| IPI00290077 | Keratin, type I cytoskeletal 15                 | 142  | 62   | 8.21E-05 |
| IPI00217963 | Keratin, type I cytoskeletal 16                 | 223  | 117  | 0.000146 |
| IPI00418422 | The Human Immunoglobulin Heavy Diversity (IGHD) | 69   | 23   | 0.000152 |
| IPI00423461 | Hypothetical protein DKFZp686C02220             | 828  | 548  | 0.000223 |
| IPI00450768 | Keratin, type I cytoskeletal 17                 | 147  | 69   | 0.000275 |
| IPI00011261 | Complement component C8 gamma chain precursor   | 266  | 152  | 0.000392 |

|             |                                                            |      |      |          |
|-------------|------------------------------------------------------------|------|------|----------|
| IPI00556567 | Ficolin-3 protein                                          | 80   | 33   | 0.00082  |
| IPI00441196 | Hypothetical protein                                       | 3090 | 2450 | 0.00095  |
| IPI00386839 | Amyloid lambda 6 light chain variable region SAR           | 180  | 98   | 0.00123  |
| IPI00017601 | Ceruloplasmin precursor                                    | 2260 | 1816 | 0.001477 |
| IPI00383953 | VH4 heavy chain variable region precursor                  | 132  | 64   | 0.001483 |
| IPI00009866 | Keratin, type I cytoskeletal 13                            | 107  | 52   | 0.001919 |
| IPI00470798 | Hypothetical protein DKFZp686E23209                        | 4508 | 3647 | 0.002099 |
| IPI00017530 | Ficolin-2 precursor                                        | 9    | 0    | 0.002266 |
| IPI00021854 | Apolipoprotein A-II precursor                              | 853  | 582  | 0.002359 |
| IPI00004550 | Hypothetical protein FLJ20261                              | 96   | 45   | 0.002388 |
| IPI00011252 | Complement component C8 alpha chain precursor              | 81   | 36   | 0.002415 |
| IPI00293898 | Hepatocellular carcinoma associated protein TB6            | 19   | 4    | 0.002728 |
| IPI00384444 | Keratin, type I cytoskeletal 14                            | 207  | 120  | 0.003123 |
| IPI00021856 | Apolipoprotein C-II precursor                              | 32   | 11   | 0.004184 |
| IPI00219806 | S100 calcium-binding protein A7                            | 8    | 0    | 0.004391 |
| IPI00446354 | Hypothetical protein FLJ41805                              | 8    | 0    | 0.004391 |
| IPI00479762 | 115 kDa protein                                            | 8    | 0    | 0.004391 |
| IPI00022446 | Platelet factor 4 precursor                                | 82   | 39   | 0.00501  |
| IPI00300725 | Keratin, type II cytoskeletal 6A                           | 158  | 90   | 0.005161 |
| IPI00242956 | Fc fragment of IgG binding protein                         | 24   | 8    | 0.006549 |
| IPI00384401 | Myosin-reactive immunoglobulin kappa chain variable region | 25   | 8    | 0.006595 |
| IPI00293665 | Keratin, type II cytoskeletal 6B                           | 141  | 79   | 0.007064 |
| IPI00299145 | Keratin, type II cytoskeletal 6E                           | 144  | 83   | 0.007904 |
| IPI00383603 | Anti-thyroglobulin light chain variable region             | 7    | 0    | 0.008538 |

|             |                                                            |      |      |          |
|-------------|------------------------------------------------------------|------|------|----------|
| IPI00452748 | Serum amyloid A protein precursor                          | 7    | 0    | 0.008538 |
| IPI00021304 | Keratin, type II cytoskeletal 2 epidermal                  | 810  | 575  | 0.009876 |
| IPI00384410 | Myosin-reactive immunoglobulin heavy chain variable region | 45   | 18   | 0.010539 |
| IPI00478600 | Ig kappa chain V-I region HK102 precursor                  | 21   | 7    | 0.011151 |
| IPI00161229 | 12 kDa protein                                             | 11   | 2    | 0.013088 |
| IPI00174757 | F-box/LRR-repeat protein 20                                | 11   | 2    | 0.013088 |
| IPI00382488 | Ig heavy chain V-III region HIL                            | 54   | 24   | 0.014584 |
| IPI00241841 | Keratin 6L                                                 | 91   | 49   | 0.01646  |
| IPI00292684 | Nuclear factor of activated T-cells, cytoplasmic 4         | 20   | 7    | 0.016874 |
| IPI00031423 | Keratin, type I cuticular HA3-II                           | 32   | 13   | 0.017334 |
| IPI00216137 | Synaptonemal complex protein 1                             | 13   | 3    | 0.020644 |
| IPI00009794 | Calcium binding protein Cab45                              | 8    | 1    | 0.021392 |
| IPI00022445 | Platelet basic protein precursor                           | 39   | 17   | 0.021453 |
| IPI00022295 | Platelet factor 4 variant precursor                        | 56   | 26   | 0.021747 |
| IPI00006662 | Apolipoprotein D precursor                                 | 112  | 66   | 0.029104 |
| IPI00384952 | Hypothetical protein DKFZp686K04218                        | 1022 | 744  | 0.030479 |
| IPI00029260 | Monocyte differentiation antigen CD14 precursor            | 11   | 3    | 0.032456 |
| IPI00016702 | Rab6 GTPase activating protein, GAPCenA                    | 5    | 0    | 0.032625 |
| IPI00216298 | Thioredoxin                                                | 5    | 0    | 0.032625 |
| IPI00217996 | Putative 4 repeat voltage-gated ion channel                | 5    | 0    | 0.032625 |
| IPI00438286 | Splice Isoform 1 of LAP2 protein                           | 5    | 0    | 0.032625 |
| IPI00550363 | Transgelin 2                                               | 5    | 0    | 0.032625 |
| IPI00552578 | Amyloid protein A                                          | 5    | 0    | 0.032625 |
| IPI00025426 | Pregnancy zone protein precursor                           | 2482 | 2049 | 0.034367 |

|             |                                                                  |      |      |          |
|-------------|------------------------------------------------------------------|------|------|----------|
| IPI00000425 | Vacuolar proton translocating ATPase 116 kDa subunit a isoform 2 | 9    | 2    | 0.035907 |
| IPI00385253 | Ig kappa chain V-III region CLL precursor                        | 7    | 1    | 0.037562 |
| IPI00385683 | Ig heavy chain V-III region GAR                                  | 7    | 1    | 0.037562 |
| IPI00413524 | 22 kDa protein                                                   | 7    | 1    | 0.037562 |
| IPI00009867 | Keratin, type II cytoskeletal 5                                  | 137  | 85   | 0.038995 |
| IPI00020019 | Adiponectin precursor                                            | 13   | 4    | 0.042833 |
| IPI00382421 | Ig lambda chain V-I region NEW                                   | 10   | 3    | 0.050744 |
| IPI00426069 | Hypothetical protein DKFZp686M24218                              | 3137 | 2592 | 0.05408  |
| IPI00419442 | IGLV6-57 protein                                                 | 26   | 13   | 0.054548 |
| IPI00552678 | MGC27165 protein                                                 | 1742 | 1394 | 0.054945 |
| IPI00022229 | Apolipoprotein B-100 precursor                                   | 4876 | 4066 | 0.057645 |
| IPI00022420 | Plasma retinol-binding protein precursor                         | 449  | 325  | 0.064063 |
| IPI00001617 | Transcription factor SOX-4                                       | 4    | 0    | 0.064148 |
| IPI00004860 | Arginyl-tRNA synthetase                                          | 4    | 0    | 0.064148 |
| IPI00007244 | Splice Isoform H17 of Myeloperoxidase precursor                  | 4    | 0    | 0.064148 |
| IPI00008052 | KIAA1287 protein                                                 | 4    | 0    | 0.064148 |
| IPI00009355 | Zinc finger CCCH type domain containing protein 1                | 4    | 0    | 0.064148 |
| IPI00018149 | Centrosome protein Cep290                                        | 4    | 0    | 0.064148 |
| IPI00026889 | Disabled homolog 1                                               | 4    | 0    | 0.064148 |
| IPI00064429 | Regeneration associated muscle protease, isoform a               | 4    | 0    | 0.064148 |
| IPI00165049 | PREDICTED: similar to Hnrpa1 protein                             | 4    | 0    | 0.064148 |
| IPI00170594 | Transcription factor ELYS                                        | 4    | 0    | 0.064148 |
| IPI00294469 | Ubiquinone biosynthesis protein COQ4 homolog                     | 4    | 0    | 0.064148 |

|             |                                                                                   |      |     |          |
|-------------|-----------------------------------------------------------------------------------|------|-----|----------|
| IPI00302453 | Ciliary dynein heavy chain 9                                                      | 4    | 0   | 0.064148 |
| IPI00555665 | RNA helicase                                                                      | 4    | 0   | 0.064148 |
| IPI00216691 | Profilin-1                                                                        | 12   | 4   | 0.06496  |
| IPI00247295 | Splice Isoform 4 of Nesprin 1                                                     | 6    | 1   | 0.065381 |
| IPI00333068 | Actin-related protein 2/3 complex subunit 1A                                      | 6    | 1   | 0.065381 |
| IPI00383871 | Mitochondrial uncoupling protein 4                                                | 6    | 1   | 0.065381 |
| IPI00387100 | Ig kappa chain V-I region Roy                                                     | 6    | 1   | 0.065381 |
| IPI00296803 | Hypothetical protein MGC40368                                                     | 19   | 9   | 0.065769 |
| IPI00008556 | Splice Isoform 1 of Coagulation factor XI precursor                               | 24   | 12  | 0.066818 |
| IPI00100787 | Hypothetical protein DKFZp434P144                                                 | 9    | 3   | 0.078294 |
| IPI00384391 | Myosin-reactive immunoglobulin heavy chain variable region                        | 98   | 62  | 0.087287 |
| IPI00296365 | Centromeric protein E                                                             | 14   | 6   | 0.089144 |
| IPI00430844 | Hypothetical protein                                                              | 1109 | 846 | 0.089274 |
| IPI00000874 | Peroxiredoxin 1                                                                   | 7    | 2   | 0.094157 |
| IPI00001611 | Splice Isoform 1 of Insulin-like growth factor II precursor                       | 7    | 2   | 0.094157 |
| IPI00032311 | Lipopolysaccharide-binding protein precursor                                      | 7    | 2   | 0.094157 |
| IPI00215836 | Splice Isoform 1 of Protocadherin gamma A2 precursor                              | 7    | 2   | 0.094157 |
| IPI00217972 | Collagen XXVII proalpha 1 chain precursor                                         | 7    | 2   | 0.094157 |
| IPI00387119 | Ig kappa chain V-III region POM                                                   | 7    | 2   | 0.094157 |
| IPI00454724 | PREDICTED: similar to Ig kappa chain V region (A2) - human                        | 7    | 2   | 0.094157 |
| IPI00446534 | Hypothetical protein FLJ41981                                                     | 1106 | 841 | 0.096291 |
| IPI00297116 | Splice Isoform 1 of Pleckstrin homology domain-containing protein family A member | 11   | 4   | 0.096865 |

|             |                                                                             |      |     |          |
|-------------|-----------------------------------------------------------------------------|------|-----|----------|
| IPI00000265 | Chromosome 10 open reading frame 38                                         | 15   | 7   | 0.100411 |
| IPI00217872 | Splice Isoform 2 of Phosphoglucomutase                                      | 26   | 14  | 0.102182 |
| IPI00426056 | Hypothetical protein DKFZp686L19235                                         | 1107 | 846 | 0.104755 |
| IPI00007461 | PREDICTED: KIAA0877 protein                                                 | 12   | 5   | 0.111583 |
| IPI00333234 | 12 kDa protein                                                              | 12   | 5   | 0.111583 |
| IPI00426070 | Hypothetical protein DKFZp686M08189                                         | 1098 | 832 | 0.111703 |
| IPI00387110 | Ig kappa chain V-II region MIL                                              | 16   | 8   | 0.112242 |
| IPI00004557 | BNIP2 motif containing molecule at the carboxyl terminal region 1           | 5    | 1   | 0.112458 |
| IPI00012391 | Splice Isoform Long of Adenomatous polyposis coli protein                   | 5    | 1   | 0.112458 |
| IPI00024880 | CEGP1 protein                                                               | 5    | 1   | 0.112458 |
| IPI00025092 | Myosin-binding protein C, slow-type                                         | 5    | 1   | 0.112458 |
| IPI00028540 | OTTHUMP00000061872                                                          | 5    | 1   | 0.112458 |
| IPI00218414 | Carbonic anhydrase II                                                       | 5    | 1   | 0.112458 |
| IPI00299635 | Baculoviral IAP repeat-containing protein 6                                 | 5    | 1   | 0.112458 |
| IPI00398012 | PREDICTED: hypothetical protein                                             | 5    | 1   | 0.112458 |
| IPI00400935 | Collagen alpha 1(XVI) chain precursor                                       | 5    | 1   | 0.112458 |
| IPI00382500 | Ig heavy chain V-III region GAL                                             | 66   | 40  | 0.119752 |
| IPI00470652 | Single-chain Fv                                                             | 40   | 22  | 0.124177 |
| IPI00001671 | Tumor necrosis factor precursor                                             | 3    | 0   | 0.126646 |
| IPI00001743 | Hypothetical protein DKFZp686G2174                                          | 3    | 0   | 0.126646 |
| IPI00003384 | Splice Isoform 1 of Cadherin EGF LAG seven-pass G-type receptor 1 precursor | 3    | 0   | 0.126646 |
| IPI00003947 | Ig lambda chain V-II region BUR                                             | 3    | 0   | 0.126646 |
| IPI00005024 | MYB binding protein 1a                                                      | 3    | 0   | 0.126646 |
| IPI00007227 | Hypothetical protein LOC22864                                               | 3    | 0   | 0.126646 |
| IPI00007834 | Splice Isoform 1 of Ankyrin-2                                               | 3    | 0   | 0.126646 |

|             |                                                                       |   |   |          |
|-------------|-----------------------------------------------------------------------|---|---|----------|
| IPI00008091 | KIAA1259 protein                                                      | 3 | 0 | 0.126646 |
| IPI00008531 | CoREST protein                                                        | 3 | 0 | 0.126646 |
| IPI00009286 | Splice Isoform 1 of Zinc finger protein HRX                           | 3 | 0 | 0.126646 |
| IPI00009524 | Splice Isoform Alpha of Tripartite motif protein 10                   | 3 | 0 | 0.126646 |
| IPI00012011 | Cofilin-1                                                             | 3 | 0 | 0.126646 |
| IPI00015346 | Cadherin EGF LAG seven-pass G-type receptor 2 precursor               | 3 | 0 | 0.126646 |
| IPI00016461 | 1-phosphatidylinositol-4,5-bisphosphate phosphodiesterase delta 1     | 3 | 0 | 0.126646 |
| IPI00022204 | Squamous cell carcinoma antigen 1                                     | 3 | 0 | 0.126646 |
| IPI00022731 | Apolipoprotein C-IV precursor                                         | 3 | 0 | 0.126646 |
| IPI00028551 | PREDICTED: similar to LPIN3                                           | 3 | 0 | 0.126646 |
| IPI00029737 | Splice Isoform Long of Long-chain-fatty-acid--CoA ligase 4            | 3 | 0 | 0.126646 |
| IPI00031836 | Developmentally regulated GTP-binding protein 1                       | 3 | 0 | 0.126646 |
| IPI00032541 | Keratin, type II cuticular HB5                                        | 3 | 0 | 0.126646 |
| IPI00036742 | Hypothetical protein DKFZp686C1522                                    | 3 | 0 | 0.126646 |
| IPI00043215 | Immunoglobulin superfamily, member 1 Isoform 1                        | 3 | 0 | 0.126646 |
| IPI00045423 | Splice Isoform 7 of Partitioning-defective 3 homolog                  | 3 | 0 | 0.126646 |
| IPI00103597 | Splice Isoform 1 of VPS10 domain-containing receptor SorCS1 precursor | 3 | 0 | 0.126646 |
| IPI00170934 | LKB1 interacting protein                                              | 3 | 0 | 0.126646 |
| IPI00217002 | Hypothetical protein DKFZp781O0144                                    | 3 | 0 | 0.126646 |
| IPI00290368 | Histidine decarboxylase                                               | 3 | 0 | 0.126646 |



|             |                                                                              |      |      |          |
|-------------|------------------------------------------------------------------------------|------|------|----------|
| IPI00301263 | CAD protein                                                                  | 3    | 0    | 0.126646 |
| IPI00304934 | Hypothetical protein FLJ23467                                                | 3    | 0    | 0.126646 |
| IPI00334715 | Splice Isoform 2 of Glucocorticoid receptor DNA binding factor 1             | 3    | 0    | 0.126646 |
| IPI00376221 | Erythrocyte membrane protein band 4.1 like                                   | 3    | 0    | 0.126646 |
| IPI00376394 | Putative sulfhydryl oxidase precursor                                        | 3    | 0    | 0.126646 |
| IPI00382422 | Ig lambda chain V-I region NEWM                                              | 3    | 0    | 0.126646 |
| IPI00383530 | Splice Isoform 2 of Rho-GTPase-activating protein 25                         | 3    | 0    | 0.126646 |
| IPI00384805 | Peroxisomal targeting signal import receptor                                 | 3    | 0    | 0.126646 |
| IPI00401122 | PREDICTED: similar to bA110H4.2 (similar to membrane protein)                | 3    | 0    | 0.126646 |
| IPI00401831 | Pleckstrin homology domain containing, family H (with MyTH4 domain) member 1 | 3    | 0    | 0.126646 |
| IPI00410334 | Sulfate/anion exchanger                                                      | 3    | 0    | 0.126646 |
| IPI00433284 | D-glucuronyl C5-epimerase                                                    | 3    | 0    | 0.126646 |
| IPI00435946 | PP10752                                                                      | 3    | 0    | 0.126646 |
| IPI00446280 | Hypothetical protein FLJ42424                                                | 3    | 0    | 0.126646 |
| IPI00550834 | Hypothetical protein FLJ36288                                                | 3    | 0    | 0.126646 |
| IPI00556645 | Similar to Forkhead box protein K1                                           | 3    | 0    | 0.126646 |
| IPI00028413 | Inter-alpha                                                                  | 106  | 70   | 0.126981 |
| IPI00059369 | Splice Isoform 1 of Hypothetical protein KIAA0555                            | 9    | 4    | 0.14028  |
| IPI00296156 | Chromosome 10 open reading frame 33                                          | 9    | 4    | 0.14028  |
| IPI00154742 | IGLC1 protein                                                                | 2169 | 1860 | 0.144673 |
| IPI00019713 | KIAA0754 protein                                                             | 6    | 2    | 0.148839 |
| IPI00375836 | Cancer associated nucleoprotein                                              | 6    | 2    | 0.148839 |

|             |                                                                    |      |      |          |
|-------------|--------------------------------------------------------------------|------|------|----------|
| IPI00413194 | Myosin-reactive immunoglobulin heavy chain variable region         | 6    | 2    | 0.148839 |
| IPI00328609 | Kallistatin precursor                                              | 15   | 8    | 0.149457 |
| IPI00061977 | MGC27165 protein                                                   | 1449 | 1138 | 0.151311 |
| IPI00104074 | M130 antigen cytoplasmic variant 2                                 | 11   | 5    | 0.158055 |
| IPI00328550 | Thrombospondin-4 precursor                                         | 16   | 9    | 0.160239 |
| IPI00032179 | Antithrombin III variant                                           | 471  | 357  | 0.163437 |
| IPI00456619 | Ig lambda chain C regions                                          | 2128 | 1822 | 0.16889  |
| IPI00026195 | Ig kappa chain V-II region RPMI 6410 precursor                     | 35   | 20   | 0.170094 |
| IPI00021855 | Apolipoprotein C-I precursor                                       | 102  | 69   | 0.176985 |
| IPI00412608 | 25 kDa protein                                                     | 2126 | 1825 | 0.177117 |
| IPI00299307 | Complement-activating component of Ra-reactive factor precursor    | 7    | 3    | 0.177249 |
| IPI00299547 | Lipocalin 2                                                        | 7    | 3    | 0.177249 |
| IPI00375793 | PREDICTED: similar to RAN-binding protein 2-like 1 isoform 1       | 7    | 3    | 0.177249 |
| IPI00020918 | LAF-4 protein                                                      | 13   | 7    | 0.18588  |
| IPI00017303 | DNA mismatch repair protein Msh2                                   | 4    | 1    | 0.190239 |
| IPI00018320 | Protocadherin 11                                                   | 4    | 1    | 0.190239 |
| IPI00027410 | Platelet glycoprotein V precursor                                  | 4    | 1    | 0.190239 |
| IPI00032064 | Splice Isoform A of A-kinase anchor protein                        | 4    | 1    | 0.190239 |
| IPI00054598 | PREDICTED: similar to family with sequence similarity 24, member B | 4    | 1    | 0.190239 |
| IPI00176740 | Hypothetical protein FLJ40265                                      | 4    | 1    | 0.190239 |
| IPI00261031 | PREDICTED: similar to hephaestin                                   | 4    | 1    | 0.190239 |
| IPI00296776 | Hypothetical protein FLJ23518                                      | 4    | 1    | 0.190239 |
| IPI00305545 | Debranching enzyme homolog 1                                       | 4    | 1    | 0.190239 |

|             |                                                                                                |      |      |          |
|-------------|------------------------------------------------------------------------------------------------|------|------|----------|
| IPI00328995 | PREDICTED: similar to Retinitis pigmentosa 9 protein (Pim-1 associated protein) (PAP-1)        | 4    | 1    | 0.190239 |
| IPI00376181 | PREDICTED: similar to RIKEN cDNA B230396O12                                                    | 4    | 1    | 0.190239 |
| IPI00377116 | Zinc finger protein 445                                                                        | 4    | 1    | 0.190239 |
| IPI00401649 | PREDICTED: hypothetical protein                                                                | 4    | 1    | 0.190239 |
| IPI00411389 | Zinc finger protein 79                                                                         | 4    | 1    | 0.190239 |
| IPI00419908 | GPR158-like 1 receptor                                                                         | 4    | 1    | 0.190239 |
| IPI00456919 | OTTHUMP00000061860                                                                             | 4    | 1    | 0.190239 |
| IPI00479915 | Obscurin                                                                                       | 4    | 1    | 0.190239 |
| IPI00295252 | Splice Isoform 1 of Phosphatidylinositol 3,4,5-trisphosphate-dependent Rac exchanger 1 protein | 21   | 12   | 0.19066  |
| IPI00385252 | Ig kappa chain V-III region GOL                                                                | 200  | 144  | 0.192203 |
| IPI00007199 | Protein Z-dependent protease inhibitor precursor                                               | 14   | 8    | 0.197808 |
| IPI00384407 | Myosin-reactive immunoglobulin heavy chain variable region                                     | 69   | 46   | 0.199198 |
| IPI00005439 | Fetuin-B precursor                                                                             | 8    | 4    | 0.200169 |
| IPI00018219 | Transforming growth factor-beta induced protein IG-H3 precursor                                | 8    | 4    | 0.200169 |
| IPI00027350 | Peroxiredoxin 2                                                                                | 22   | 14   | 0.203456 |
| IPI00218816 | Hemoglobin beta chain                                                                          | 573  | 444  | 0.205717 |
| IPI00003939 | Ig lambda chain V-I region NIG-64                                                              | 15   | 9    | 0.20906  |
| IPI00007221 | Plasma serine protease inhibitor precursor                                                     | 15   | 9    | 0.20906  |
| IPI00026175 | Ig kappa chain V-II region GM607 precursor                                                     | 24   | 15   | 0.210649 |
| IPI00479461 | 23 kDa protein                                                                                 | 2121 | 1820 | 0.216559 |

|             |                                                                       |      |      |          |
|-------------|-----------------------------------------------------------------------|------|------|----------|
| IPI00387024 | Ig kappa chain V-I region CAR                                         | 25   | 16   | 0.217832 |
| IPI00032899 | DEAD (Asp-Glu-Ala-Asp) box polypeptide                                | 9    | 5    | 0.219152 |
| IPI00294713 | Splice Isoform 1 of Mannan-binding lectin serine protease 2 precursor | 9    | 5    | 0.219152 |
| IPI00387105 | Ig kappa chain V-I region Mev                                         | 9    | 5    | 0.219152 |
| IPI00022391 | Serum amyloid P-component precursor                                   | 103  | 72   | 0.222899 |
| IPI00022429 | Alpha-1-acid glycoprotein 1 precursor                                 | 297  | 218  | 0.225015 |
| IPI00018769 | Thrombospondin-2 precursor                                            | 5    | 2    | 0.23015  |
| IPI00019502 | Myosin heavy chain, nonmuscle type A                                  | 5    | 2    | 0.23015  |
| IPI00552874 | V1-3 protein                                                          | 5    | 2    | 0.23015  |
| IPI00550162 | Hypothetical protein                                                  | 2120 | 1825 | 0.231042 |
| IPI00024825 | Megakaryocyte stimulating factor                                      | 21   | 14   | 0.250802 |
| IPI00000192 | Splice Isoform F of SON protein                                       | 2    | 0    | 0.251098 |
| IPI00000733 | WD-repeat protein 50                                                  | 2    | 0    | 0.251098 |
| IPI00001690 | Cullin-7                                                              | 2    | 0    | 0.251098 |
| IPI00001780 | Ubiquitin carboxyl-terminal hydrolase 16                              | 2    | 0    | 0.251098 |
| IPI00001919 | Similar to Nucleotide binding protein 2                               | 2    | 0    | 0.251098 |
| IPI00003441 | Hypothetical protein ORF9 precursor                                   | 2    | 0    | 0.251098 |
| IPI00004364 | Orphan nuclear receptor PAR2                                          | 2    | 0    | 0.251098 |
| IPI00004450 | Testes specific heterogenous nuclear ribonucleoprotein G-T            | 2    | 0    | 0.251098 |
| IPI00004970 | Down-regulated in metastasis protein                                  | 2    | 0    | 0.251098 |
| IPI00005020 | Splice Isoform 4 of Zinc finger protein 64, isoforms 3 and 4          | 2    | 0    | 0.251098 |
| IPI00005589 | 16 kDa protein                                                        | 2    | 0    | 0.251098 |
| IPI00006035 | KIAA0590 protein                                                      | 2    | 0    | 0.251098 |
| IPI00006854 | Ras GTPase-activating protein nGAP                                    | 2    | 0    | 0.251098 |
| IPI00007344 | Embryonic lung protein                                                | 2    | 0    | 0.251098 |

|             |                                                                                 |   |   |          |
|-------------|---------------------------------------------------------------------------------|---|---|----------|
| IPI00007843 | Myelin transcription factor 1-like                                              | 2 | 0 | 0.251098 |
| IPI00009464 | Splice Isoform 1 of Exosome component 10                                        | 2 | 0 | 0.251098 |
| IPI00009736 | Retinoic acid receptor RXR-gamma                                                | 2 | 0 | 0.251098 |
| IPI00009753 | Pellino protein homolog 2                                                       | 2 | 0 | 0.251098 |
| IPI00010807 | Frizzled 8 precursor                                                            | 2 | 0 | 0.251098 |
| IPI00010948 | Tripartite motif protein 26                                                     | 2 | 0 | 0.251098 |
| IPI00012462 | CDA02                                                                           | 2 | 0 | 0.251098 |
| IPI00012858 | Splice Isoform 1 of Potassium voltage-gated channel subfamily KQT member 2      | 2 | 0 | 0.251098 |
| IPI00012887 | Cathepsin L precursor                                                           | 2 | 0 | 0.251098 |
| IPI00012912 | Carnitine O-palmitoyltransferase II, mitochondrial precursor                    | 2 | 0 | 0.251098 |
| IPI00013218 | Patatin-like phospholipase domain containing protein 4                          | 2 | 0 | 0.251098 |
| IPI00013773 | Receptor-interacting serine/threonine-protein kinase 2                          | 2 | 0 | 0.251098 |
| IPI00013838 | 51C protein                                                                     | 2 | 0 | 0.251098 |
| IPI00013860 | 3-hydroxyisobutyrate dehydrogenase, mitochondrial precursor                     | 2 | 0 | 0.251098 |
| IPI00014238 | Lysyl-tRNA synthetase                                                           | 2 | 0 | 0.251098 |
| IPI00015135 | Exostosin-like 3                                                                | 2 | 0 | 0.251098 |
| IPI00015695 | Hypothetical protein FLJ23554                                                   | 2 | 0 | 0.251098 |
| IPI00016553 | Splice Isoform 1 of Solute carrier organic anion transporter family, member 2B1 | 2 | 0 | 0.251098 |
| IPI00017502 | De-etiolatedD 1                                                                 | 2 | 0 | 0.251098 |
| IPI00018236 | Ganglioside GM2 activator precursor                                             | 2 | 0 | 0.251098 |
| IPI00018321 | Splice Isoform 1 of Histone-lysine N-methyltransferase, H3 lysine-9 specific 4  | 2 | 0 | 0.251098 |

|             |                                                             |   |   |          |
|-------------|-------------------------------------------------------------|---|---|----------|
| IPI00018953 | Dipeptidyl peptidase 4                                      | 2 | 0 | 0.251098 |
| IPI00019172 | Splice Isoform 1 of SH3-containing GRB2-like protein 3      | 2 | 0 | 0.251098 |
| IPI00019282 | Melanoma antigen preferentially expressed in tumors         | 2 | 0 | 0.251098 |
| IPI00020128 | Hepatocellular carcinoma-associated antigen                 | 2 | 0 | 0.251098 |
| IPI00020294 | MYH7B protein                                               | 2 | 0 | 0.251098 |
| IPI00020884 | Plexin A3 precursor                                         | 2 | 0 | 0.251098 |
| IPI00021772 | S-adenosylmethionine synthetase alpha and beta forms        | 2 | 0 | 0.251098 |
| IPI00022470 | Zinc finger protein 516                                     | 2 | 0 | 0.251098 |
| IPI00023617 | Zinc finger protein 197                                     | 2 | 0 | 0.251098 |
| IPI00023807 | Semaphorin 4D precursor                                     | 2 | 0 | 0.251098 |
| IPI00024754 | Splice Isoform 1 of G-protein coupled receptor 64 precursor | 2 | 0 | 0.251098 |
| IPI00025418 | Collagen alpha 1(VII) chain precursor                       | 2 | 0 | 0.251098 |
| IPI00026216 | Puromycin-sensitive aminopeptidase                          | 2 | 0 | 0.251098 |
| IPI00027983 | Cytidine deaminase                                          | 2 | 0 | 0.251098 |
| IPI00028130 | GC-rich sequence DNA-binding factor                         | 2 | 0 | 0.251098 |
| IPI00028931 | Desmoglein-2 precursor                                      | 2 | 0 | 0.251098 |
| IPI00029372 | Hypothetical protein DKFZp686I1868                          | 2 | 0 | 0.251098 |
| IPI00029403 | Sorting nexin 4                                             | 2 | 0 | 0.251098 |
| IPI00029446 | Splice Isoform 1 of SET binding factor 1                    | 2 | 0 | 0.251098 |
| IPI00029498 | Ropporin                                                    | 2 | 0 | 0.251098 |
| IPI00029728 | TFIIH basal transcription factor complex helicase subunit   | 2 | 0 | 0.251098 |
| IPI00029751 | Splice Isoform 1 of Contactin 1 precursor                   | 2 | 0 | 0.251098 |

|             |                                                                               |   |   |          |
|-------------|-------------------------------------------------------------------------------|---|---|----------|
| IPI00032121 | Splice Isoform 5 of Natural cytotoxicity triggering receptor 3 precursor      | 2 | 0 | 0.251098 |
| IPI00032929 | Transmembrane molecule with thrombospondin module precursor                   | 2 | 0 | 0.251098 |
| IPI00045864 | Hypothetical protein FLJ14710                                                 | 2 | 0 | 0.251098 |
| IPI00060200 | Aldose 1-epimerase                                                            | 2 | 0 | 0.251098 |
| IPI00064917 | MGC27169 protein                                                              | 2 | 0 | 0.251098 |
| IPI00065256 | Leucine-rich repeat-containing protein 2                                      | 2 | 0 | 0.251098 |
| IPI00066817 | WD-repeat protein 10                                                          | 2 | 0 | 0.251098 |
| IPI00069270 | Splice Isoform 1 of Nuclear receptor coactivator 3                            | 2 | 0 | 0.251098 |
| IPI00073148 | Splice Isoform 1 of Cell death activator                                      | 2 | 0 | 0.251098 |
| IPI00088953 | P87 phosphoinositide 3-kinase gamma adapter protein                           | 2 | 0 | 0.251098 |
| IPI00101923 | KIAA1840 protein                                                              | 2 | 0 | 0.251098 |
| IPI00102407 | Novel protein                                                                 | 2 | 0 | 0.251098 |
| IPI00147878 | 20 kDa protein                                                                | 2 | 0 | 0.251098 |
| IPI00150282 | 28 kDa protein                                                                | 2 | 0 | 0.251098 |
| IPI00151888 | Splice Isoform 1 of Deducator of cytokinesis protein 9                        | 2 | 0 | 0.251098 |
| IPI00152143 | Zinc finger protein 519                                                       | 2 | 0 | 0.251098 |
| IPI00152255 | ADAM 32 precursor                                                             | 2 | 0 | 0.251098 |
| IPI00152295 | LOC132671                                                                     | 2 | 0 | 0.251098 |
| IPI00152542 | Rabconnectin                                                                  | 2 | 0 | 0.251098 |
| IPI00152899 | Splice Isoform 1 of Voltage-dependent T-type calcium channel alpha-1I subunit | 2 | 0 | 0.251098 |
| IPI00154829 | EEG1L                                                                         | 2 | 0 | 0.251098 |
| IPI00155437 | FLJ14154 protein                                                              | 2 | 0 | 0.251098 |

|             |                                                                         |   |   |          |
|-------------|-------------------------------------------------------------------------|---|---|----------|
| IPI00160622 | Splice Isoform 1 of Centrosomal protein 2                               | 2 | 0 | 0.251098 |
| IPI00165970 | Splice Isoform 1 of DGCR8 protein                                       | 2 | 0 | 0.251098 |
| IPI00165984 | Splice Isoform 1 of WD-repeat protein 35                                | 2 | 0 | 0.251098 |
| IPI00166323 | Hypothetical protein FLJ33811                                           | 2 | 0 | 0.251098 |
| IPI00166863 | Hypothetical protein LOC84902                                           | 2 | 0 | 0.251098 |
| IPI00167087 | COL3A1 protein                                                          | 2 | 0 | 0.251098 |
| IPI00167292 | Hypothetical protein FLJ40424                                           | 2 | 0 | 0.251098 |
| IPI00167672 | Hypothetical protein FLJ37906                                           | 2 | 0 | 0.251098 |
| IPI00168743 | NFAT activation molecule 1 precursor                                    | 2 | 0 | 0.251098 |
| IPI00168920 | OTTHUMP00000058978                                                      | 2 | 0 | 0.251098 |
| IPI00170751 | Tigger transposable element derived 5 variant                           | 2 | 0 | 0.251098 |
| IPI00173461 | Junctophilin 1                                                          | 2 | 0 | 0.251098 |
| IPI00175092 | Ring finger protein 149                                                 | 2 | 0 | 0.251098 |
| IPI00176377 | PREDICTED: similar to Sorbitol dehydrogenase (L-iditol 2-dehydrogenase) | 2 | 0 | 0.251098 |
| IPI00179197 | Similar to Protein kinase                                               | 2 | 0 | 0.251098 |
| IPI00183535 | Hypothetical protein FLJ10876                                           | 2 | 0 | 0.251098 |
| IPI00184874 | Adenosine deaminase ADAR2                                               | 2 | 0 | 0.251098 |
| IPI00187011 | PREDICTED: chromosome 19 open reading frame 7                           | 2 | 0 | 0.251098 |
| IPI00216429 | Splice Isoform 5-HT4(F) of 5-hydroxytryptamine 4 receptor               | 2 | 0 | 0.251098 |
| IPI00216800 | Similar to phospholipase A2, group IVB                                  | 2 | 0 | 0.251098 |
| IPI00217001 | PREDICTED: chromosome 14 open reading frame 78                          | 2 | 0 | 0.251098 |
| IPI00217259 | TEX14 protein                                                           | 2 | 0 | 0.251098 |
| IPI00217437 | TTBK2 protein                                                           | 2 | 0 | 0.251098 |



|             |                                                              |   |   |          |
|-------------|--------------------------------------------------------------|---|---|----------|
| IPI00217732 | Aryl hydrocarbon receptor nuclear translocator-like          | 2 | 0 | 0.251098 |
| IPI00218524 | Splice Isoform 2 of Piccolo protein                          | 2 | 0 | 0.251098 |
| IPI00219505 | Splice Isoform 3 of Ubiquitin carboxyl-terminal hydrolase 15 | 2 | 0 | 0.251098 |
| IPI00219529 | Splice Isoform 2 of Dystrobrevin beta                        | 2 | 0 | 0.251098 |
| IPI00219685 | Cell death-regulatory protein GRIM19                         | 2 | 0 | 0.251098 |
| IPI00219913 | Ubiquitin carboxyl-terminal hydrolase 14                     | 2 | 0 | 0.251098 |
| IPI00233074 | PREDICTED: melanoma antigen, family B, 5                     | 2 | 0 | 0.251098 |
| IPI00235051 | PREDICTED: hypothetical protein                              | 2 | 0 | 0.251098 |
| IPI00235708 | PREDICTED: similar to RIKEN cDNA 0610012A05                  | 2 | 0 | 0.251098 |
| IPI00241409 | PREDICTED: hypothetical protein                              | 2 | 0 | 0.251098 |
| IPI00241802 | PREDICTED: similar to hypothetical protein DKFZp434J0113     | 2 | 0 | 0.251098 |
| IPI00248930 | 51 kDa protein                                               | 2 | 0 | 0.251098 |
| IPI00289851 | OTTHUMP00000022249                                           | 2 | 0 | 0.251098 |
| IPI00290854 | A-kinase anchor protein 3                                    | 2 | 0 | 0.251098 |
| IPI00290856 | Lymphatic endothelium-specific hyaluronan receptor LYVE-1    | 2 | 0 | 0.251098 |
| IPI00292130 | Dermatopontin precursor                                      | 2 | 0 | 0.251098 |
| IPI00292326 | Sperm-associated antigen 1                                   | 2 | 0 | 0.251098 |
| IPI00293655 | ATP-dependent helicase DDX1                                  | 2 | 0 | 0.251098 |
| IPI00293659 | Polycystic kidney disease 1-like isoform b                   | 2 | 0 | 0.251098 |
| IPI00295601 | BM88 antigen                                                 | 2 | 0 | 0.251098 |
| IPI00296036 | Eomesodermin homolog                                         | 2 | 0 | 0.251098 |
| IPI00296114 | Large neutral amino acids transporter small subunit 2        | 2 | 0 | 0.251098 |

|             |                                                               |   |   |          |
|-------------|---------------------------------------------------------------|---|---|----------|
| IPI00296353 | Hypothetical protein DKFZp762I167                             | 2 | 0 | 0.251098 |
| IPI00297860 | G2/mitotic-specific cyclin F                                  | 2 | 0 | 0.251098 |
| IPI00297880 | Splice Isoform Long of Integrin beta-7 precursor              | 2 | 0 | 0.251098 |
| IPI00300126 | 56 kDa protein                                                | 2 | 0 | 0.251098 |
| IPI00300393 | Hypothetical protein FLJ35936                                 | 2 | 0 | 0.251098 |
| IPI00302320 | Hypothetical protein                                          | 2 | 0 | 0.251098 |
| IPI00303401 | FLJ10874 protein                                              | 2 | 0 | 0.251098 |
| IPI00304721 | Splice Isoform 1 of Potential carboxypeptidase X precursor    | 2 | 0 | 0.251098 |
| IPI00304903 | Cornifin B                                                    | 2 | 0 | 0.251098 |
| IPI00305296 | Hypothetical protein FLJ11773                                 | 2 | 0 | 0.251098 |
| IPI00305360 | Agmatinase, mitochondrial precursor                           | 2 | 0 | 0.251098 |
| IPI00305827 | Fibronectin type III and SPRY domain containing 1             | 2 | 0 | 0.251098 |
| IPI00328156 | Amine oxidase [flavin-containing] B                           | 2 | 0 | 0.251098 |
| IPI00328350 | Niban protein                                                 | 2 | 0 | 0.251098 |
| IPI00328905 | 185 kDa protein                                               | 2 | 0 | 0.251098 |
| IPI00335044 | Mitochondrial solute carrier protein                          | 2 | 0 | 0.251098 |
| IPI00335617 | OTTHUMP00000042125                                            | 2 | 0 | 0.251098 |
| IPI00374294 | PREDICTED: hypothetical protein                               | 2 | 0 | 0.251098 |
| IPI00374907 | PREDICTED: hypothetical protein                               | 2 | 0 | 0.251098 |
| IPI00375737 | Hypothetical protein DKFZp686K091                             | 2 | 0 | 0.251098 |
| IPI00375907 | Transducer of regulated cAMP response element-binding protein | 2 | 0 | 0.251098 |
| IPI00377122 | KIAA1875 protein                                              | 2 | 0 | 0.251098 |
| IPI00382439 | Ig lambda chain V-IV region X                                 | 2 | 0 | 0.251098 |
| IPI00382511 | Hypothetical protein FLJ30520                                 | 2 | 0 | 0.251098 |

|             |                                                                             |   |   |          |
|-------------|-----------------------------------------------------------------------------|---|---|----------|
| IPI00382989 | DERP13                                                                      | 2 | 0 | 0.251098 |
| IPI00383356 | Alpha-1 type XIII collagen                                                  | 2 | 0 | 0.251098 |
| IPI00383526 | Ligase-like protein                                                         | 2 | 0 | 0.251098 |
| IPI00384396 | V4-2 protein                                                                | 2 | 0 | 0.251098 |
| IPI00385800 | Sarcolemmal associated protein 1                                            | 2 | 0 | 0.251098 |
| IPI00386940 | Hypothetical protein FLJ11811                                               | 2 | 0 | 0.251098 |
| IPI00387168 | Splice Isoform 1 of Proprotein convertase subtilisin/kexin type 9 precursor | 2 | 0 | 0.251098 |
| IPI00394693 | Shb-like adapter protein, Shf                                               | 2 | 0 | 0.251098 |
| IPI00396658 | Hypothetical protein FLJ32603                                               | 2 | 0 | 0.251098 |
| IPI00397015 | Novel protein                                                               | 2 | 0 | 0.251098 |
| IPI00397125 | PREDICTED: hypothetical protein                                             | 2 | 0 | 0.251098 |
| IPI00397491 | PREDICTED: hypothetical protein                                             | 2 | 0 | 0.251098 |
| IPI00398716 | BA207C16.2                                                                  | 2 | 0 | 0.251098 |
| IPI00399062 | PREDICTED: similar to hypothetical protein                                  | 2 | 0 | 0.251098 |
| IPI00399254 | HIV-1 induced protein HIN-1 isoform 1                                       | 2 | 0 | 0.251098 |
| IPI00401113 | PREDICTED: similar to acetoacetyl-CoA synthetase                            | 2 | 0 | 0.251098 |
| IPI00401472 | PREDICTED: hypothetical protein                                             | 2 | 0 | 0.251098 |
| IPI00410355 | Testis-specific BRDT protein                                                | 2 | 0 | 0.251098 |
| IPI00411844 | MSTP086                                                                     | 2 | 0 | 0.251098 |
| IPI00414165 | 53 kDa protein                                                              | 2 | 0 | 0.251098 |
| IPI00414388 | 351 kDa protein                                                             | 2 | 0 | 0.251098 |
| IPI00418760 | Hypothetical protein FLJ46362                                               | 2 | 0 | 0.251098 |
| IPI00419527 | FLJ43980 protein                                                            | 2 | 0 | 0.251098 |
| IPI00428401 | Splice Isoform 1 of Methyl-CpG-binding domain protein 5                     | 2 | 0 | 0.251098 |
| IPI00445439 | Hypothetical protein FLJ44095                                               | 2 | 0 | 0.251098 |

|             |                                                            |     |     |          |
|-------------|------------------------------------------------------------|-----|-----|----------|
| IPI00455388 | PREDICTED: similar to zinc finger protein 91 (HPF7, HTF10) | 2   | 0   | 0.251098 |
| IPI00455902 | PREDICTED: similar to extensin-like protein                | 2   | 0   | 0.251098 |
| IPI00456560 | PREDICTED: hypothetical protein                            | 2   | 0   | 0.251098 |
| IPI00456733 | Novel protein                                              | 2   | 0   | 0.251098 |
| IPI00457155 | PREDICTED: similar to hypothetical protein DKFZp434I1020   | 2   | 0   | 0.251098 |
| IPI00464973 | PREDICTED: odz, odd Oz/ten-m homolog 4                     | 2   | 0   | 0.251098 |
| IPI00465061 | FLJ10081 protein                                           | 2   | 0   | 0.251098 |
| IPI00465123 | PREDICTED: similar to myocyte nuclear                      | 2   | 0   | 0.251098 |
| IPI00465140 | Hypothetical protein DKFZp686K0367                         | 2   | 0   | 0.251098 |
| IPI00470802 | Hypothetical protein DKFZp781B0622                         | 2   | 0   | 0.251098 |
| IPI00470867 | Hypothetical protein DKFZp686C0668                         | 2   | 0   | 0.251098 |
| IPI00470954 | Hypothetical protein DKFZp686N1231                         | 2   | 0   | 0.251098 |
| IPI00477349 | Hypothetical protein FLJ25919                              | 2   | 0   | 0.251098 |
| IPI00477585 | 39 kDa protein                                             | 2   | 0   | 0.251098 |
| IPI00478375 | 12 kDa protein                                             | 2   | 0   | 0.251098 |
| IPI00479575 | 107 kDa protein                                            | 2   | 0   | 0.251098 |
| IPI00479691 | 33 kDa protein                                             | 2   | 0   | 0.251098 |
| IPI00480010 | PR-domain zinc finger protein 13                           | 2   | 0   | 0.251098 |
| IPI00550716 | Hypothetical protein                                       | 2   | 0   | 0.251098 |
| IPI00552561 | Novel protein                                              | 2   | 0   | 0.251098 |
| IPI00552566 | HSPC004                                                    | 2   | 0   | 0.251098 |
| IPI00555942 | Dopamine beta-hydroxylase                                  | 2   | 0   | 0.251098 |
| IPI00294004 | Vitamin K-dependent protein S precursor                    | 164 | 119 | 0.254734 |
| IPI00022918 | Chromosome 9 open reading frame 28, isoform 2              | 22  | 15  | 0.256208 |
| IPI00297333 | PREDICTED: KIAA1171 protein                                | 13  | 8   | 0.257204 |

|             |                                                                                |      |      |          |
|-------------|--------------------------------------------------------------------------------|------|------|----------|
| IPI00179330 | Ubiquitin and ribosomal protein S27a                                           | 6    | 3    | 0.258203 |
| IPI00298738 | DNA-directed RNA polymerase, mitochondrial precursor                           | 6    | 3    | 0.258203 |
| IPI00382442 | Ig lambda chain V-V region DEL                                                 | 6    | 3    | 0.258203 |
| IPI00215983 | Carbonic anhydrase I                                                           | 14   | 9    | 0.267141 |
| IPI00387117 | Ig kappa chain V-III region Ti                                                 | 191  | 141  | 0.271347 |
| IPI00385985 | Ig lambda chain V-III region LOI                                               | 105  | 74   | 0.272949 |
| IPI00395595 | DEAH (Asp-Glu-Ala-Asp/His) box polypeptide 57 isoform 1                        | 7    | 4    | 0.279328 |
| IPI00292950 | Heparin cofactor II precursor                                                  | 222  | 168  | 0.287472 |
| IPI00328103 | Type I inner root sheath specific keratin 25                                   | 96   | 69   | 0.291299 |
| IPI00477644 | 25 kDa protein                                                                 | 1764 | 1478 | 0.292044 |
| IPI00007852 | Myosin-reactive immunoglobulin light chain variable region                     | 20   | 14   | 0.304552 |
| IPI00010195 | Hypothetical protein FLJ12911                                                  | 3    | 1    | 0.314143 |
| IPI00018279 | Collagen alpha 3(V) chain precursor                                            | 3    | 1    | 0.314143 |
| IPI00018879 | Alpha-L-iduronidase precursor                                                  | 3    | 1    | 0.314143 |
| IPI00020197 | Alpha-N-acetylneuraminide alpha-2,8-sialyltransferase                          | 3    | 1    | 0.314143 |
| IPI00022919 | Protein A-2                                                                    | 3    | 1    | 0.314143 |
| IPI00024284 | Basement membrane-specific heparan sulfate proteoglycan core protein precursor | 3    | 1    | 0.314143 |
| IPI00026698 | KIAA0822 protein                                                               | 3    | 1    | 0.314143 |
| IPI00030880 | Splice Isoform Flop of Glutamate receptor 1 precursor                          | 3    | 1    | 0.314143 |
| IPI00044369 | ARFP2514                                                                       | 3    | 1    | 0.314143 |
| IPI00045914 | Msx2-interacting protein                                                       | 3    | 1    | 0.314143 |
| IPI00061009 | Hypothetical protein FLJ31872                                                  | 3    | 1    | 0.314143 |

|             |                                                                                          |   |   |          |
|-------------|------------------------------------------------------------------------------------------|---|---|----------|
| IPI00062213 | Hypothetical protein FLJ33334                                                            | 3 | 1 | 0.314143 |
| IPI00063523 | PREDICTED: similar to Centromeric protein E (CENP-E protein)                             | 3 | 1 | 0.314143 |
| IPI00142538 | Splice Isoform 1 of Probable helicase                                                    | 3 | 1 | 0.314143 |
| IPI00152865 | PREDICTED: RUN and TBC1 domain containing 2                                              | 3 | 1 | 0.314143 |
| IPI00166291 | Sprouty-related, EVH1 domain containing protein 1                                        | 3 | 1 | 0.314143 |
| IPI00216197 | Splice Isoform C of Caspase-10 precursor                                                 | 3 | 1 | 0.314143 |
| IPI00221224 | Aminopeptidase N                                                                         | 3 | 1 | 0.314143 |
| IPI00292171 | Chromobox homolog 2 isoform 1                                                            | 3 | 1 | 0.314143 |
| IPI00298057 | Periplakin                                                                               | 3 | 1 | 0.314143 |
| IPI00302592 | FLJ00343 protein                                                                         | 3 | 1 | 0.314143 |
| IPI00333143 | Diacylglycerol kinase, alpha                                                             | 3 | 1 | 0.314143 |
| IPI00334254 | Hypothetical protein FLJ40230                                                            | 3 | 1 | 0.314143 |
| IPI00382476 | Ig heavy chain V-III region WEA                                                          | 3 | 1 | 0.314143 |
| IPI00382539 | Ig heavy chain V-II region WAH                                                           | 3 | 1 | 0.314143 |
| IPI00385035 | Neural cell adhesion molecule                                                            | 3 | 1 | 0.314143 |
| IPI00397204 | PREDICTED: similar to Ig kappa chain precursor V region (orphan V108) - human (fragment) | 3 | 1 | 0.314143 |
| IPI00402655 | PREDICTED: hypothetical protein                                                          | 3 | 1 | 0.314143 |
| IPI00409675 | Splice Isoform 1 of Mortality factor 4-like protein 1                                    | 3 | 1 | 0.314143 |
| IPI00418325 | MGC17624 protein                                                                         | 3 | 1 | 0.314143 |
| IPI00472263 | Putative transcription factor-like nuclear regulator                                     | 3 | 1 | 0.314143 |

|             |                                                                                                                       |      |      |          |
|-------------|-----------------------------------------------------------------------------------------------------------------------|------|------|----------|
| IPI00477911 | 55 kDa protein                                                                                                        | 3    | 1    | 0.314143 |
| IPI00478344 | 19 kDa protein                                                                                                        | 3    | 1    | 0.314143 |
| IPI00514320 | Similar to Lamin A/C                                                                                                  | 3    | 1    | 0.314143 |
| IPI00554752 | cAMP-dependent protein kinase type II-beta regulatory subunit                                                         | 3    | 1    | 0.314143 |
| IPI00604736 | Hematopoietic protein 1                                                                                               | 3    | 1    | 0.314143 |
| IPI00290078 | Keratin, type II cytoskeletal 4                                                                                       | 22   | 16   | 0.314735 |
| IPI00387107 | Ig kappa chain V-II region Cum                                                                                        | 22   | 16   | 0.314735 |
| IPI00047471 | Hypothetical protein FLJ23984                                                                                         | 11   | 7    | 0.319102 |
| IPI00307729 | ADAMTS-3 precursor                                                                                                    | 12   | 8    | 0.328025 |
| IPI00387115 | Ig kappa chain V-III region SIE                                                                                       | 204  | 155  | 0.335266 |
| IPI00430823 | Hypothetical protein                                                                                                  | 1758 | 1476 | 0.342103 |
| IPI00019576 | Coagulation factor X precursor                                                                                        | 14   | 10   | 0.343016 |
| IPI00002232 | Serine/threonine kinase TAO1                                                                                          | 4    | 2    | 0.3458   |
| IPI00022316 | 28S ribosomal protein S18b, mitochondrial precursor                                                                   | 4    | 2    | 0.3458   |
| IPI00022890 | Ig lambda chain V region 4A precursor                                                                                 | 4    | 2    | 0.3458   |
| IPI00175101 | PREDICTED: similar to KIAA0445 protein                                                                                | 4    | 2    | 0.3458   |
| IPI00339217 | Ovochymase precursor                                                                                                  | 4    | 2    | 0.3458   |
| IPI00395333 | PREDICTED: similar to BMP-2 inducible protein kinase (BIKe) (HRIHFB2017)                                              | 4    | 2    | 0.3458   |
| IPI00445800 | Hypothetical protein FLJ43087                                                                                         | 4    | 2    | 0.3458   |
| IPI00455917 | PREDICTED: similar to Collagen-binding protein 2 precursor (Colligin 2) (Rheumatoid arthritis related antigen RA-A47) | 4    | 2    | 0.3458   |
| IPI00552943 | V1-11 protein                                                                                                         | 4    | 2    | 0.3458   |
| IPI00604529 | Hypothetical protein                                                                                                  | 4    | 2    | 0.3458   |

|             |                                                                                                                                                                     |      |      |          |
|-------------|---------------------------------------------------------------------------------------------------------------------------------------------------------------------|------|------|----------|
| IPI00242446 | PREDICTED: hypothetical protein                                                                                                                                     | 150  | 114  | 0.354876 |
| IPI00553132 | SNC73 protein                                                                                                                                                       | 1663 | 1362 | 0.363926 |
| IPI00007906 | Myosin-reactive immunoglobulin heavy chain variable region                                                                                                          | 5    | 3    | 0.365668 |
| IPI00009826 | Carboxypeptidase B precursor                                                                                                                                        | 5    | 3    | 0.365668 |
| IPI00030917 | Growth factor receptor-bound protein 14                                                                                                                             | 5    | 3    | 0.365668 |
| IPI00060523 | Hypothetical protein LOC116238                                                                                                                                      | 5    | 3    | 0.365668 |
| IPI00183368 | PI-3-kinase-related kinase SMG-1                                                                                                                                    | 5    | 3    | 0.365668 |
| IPI00293451 | TighT juncTion proTein 3 (zona occludens 3)                                                                                                                         | 5    | 3    | 0.365668 |
| IPI00387097 | Ig kappa chain V-I region Lay                                                                                                                                       | 5    | 3    | 0.365668 |
| IPI00431749 | Keratin b20                                                                                                                                                         | 20   | 15   | 0.368405 |
| IPI00011255 | Platelet glycoprotein Ib alpha chain precursor                                                                                                                      | 6    | 4    | 0.379633 |
| IPI00021364 | Properdin precursor                                                                                                                                                 | 6    | 4    | 0.379633 |
| IPI00292690 | Hypothetical protein PIK3CG                                                                                                                                         | 6    | 4    | 0.379633 |
| IPI00552267 | Homo sapiens This CDS feature is included to show the translation of the corresponding V_region. Presently translation qualifiers on V_region features are illegal. | 6    | 4    | 0.379633 |
| IPI00011268 | RNA binding protein                                                                                                                                                 | 25   | 18   | 0.380526 |
| IPI00382499 | Ig heavy chain V-III region JON                                                                                                                                     | 27   | 19   | 0.383464 |
| IPI00386879 | Hypothetical protein FLJ14473                                                                                                                                       | 1660 | 1370 | 0.384882 |
| IPI00298888 | Protocadherin 17                                                                                                                                                    | 7    | 5    | 0.39015  |
| IPI00328762 | ABC A13                                                                                                                                                             | 7    | 5    | 0.39015  |
| IPI00328842 | ARHGAP4 protein                                                                                                                                                     | 7    | 5    | 0.39015  |
| IPI00296608 | Complement component C7 precursor                                                                                                                                   | 127  | 99   | 0.394384 |
| IPI00007047 | Calgranulin A                                                                                                                                                       | 9    | 6    | 0.398386 |
| IPI00387106 | Ig kappa chain V-I region Ni                                                                                                                                        | 9    | 6    | 0.398386 |



|             |                                                             |      |      |          |
|-------------|-------------------------------------------------------------|------|------|----------|
| IPI00023014 | Von Willebrand factor precursor                             | 153  | 117  | 0.403071 |
| IPI00430806 | Hypothetical protein                                        | 2071 | 1799 | 0.404321 |
| IPI00454790 | PREDICTED: hypothetical protein                             | 10   | 7    | 0.404453 |
| IPI00556624 | Keratin 1                                                   | 1493 | 1213 | 0.40805  |
| IPI00004373 | Mannose-binding protein C precursor                         | 12   | 9    | 0.414116 |
| IPI00030809 | Gamma-G globin                                              | 61   | 45   | 0.422231 |
| IPI00384404 | Myosin-reactive immunoglobulin heavy chain variable region  | 15   | 12   | 0.42435  |
| IPI00423460 | Hypothetical protein DKFZp686G21220                         | 1518 | 1238 | 0.431388 |
| IPI00019359 | Keratin 9                                                   | 720  | 571  | 0.433109 |
| IPI00290857 | Keratin, type II cytoskeletal 3                             | 20   | 16   | 0.434279 |
| IPI00386158 | Hypothetical protein                                        | 2066 | 1805 | 0.448628 |
| IPI00450309 | IGLC2 protein                                               | 2035 | 1766 | 0.454592 |
| IPI00555945 | IGLC2 protein                                               | 2045 | 1781 | 0.474101 |
| IPI00292530 | Inter-alpha-trypsin inhibitor heavy chain H1 precursor      | 779  | 623  | 0.489254 |
| IPI00002466 | Hypothetical protein LQFBS-1                                | 2    | 2    | 0.5      |
| IPI00003351 | Extracellular matrix protein 1 precursor                    | 23   | 19   | 0.5      |
| IPI00003971 | Splice Isoform RTN1-A of Reticulon 1                        | 6    | 5    | 0.5      |
| IPI00004566 | Tyrosine-protein kinase ITK/TSK                             | 6    | 6    | 0.5      |
| IPI00005079 | Mothers against decapentaplegic homolog 7                   | 2    | 1    | 0.5      |
| IPI00005661 | Splice Isoform Gamma of Transcription factor-like protein 4 | 49   | 37   | 0.5      |
| IPI00006091 | Splice Isoform 4 of Dystrophin                              | 2    | 1    | 0.5      |
| IPI00006543 | Complement factor H-related 5                               | 14   | 12   | 0.5      |
| IPI00007067 | Golgi-associated plant pathogenesis-related protein 1       | 3    | 2    | 0.5      |
| IPI00007219 | Cytochrome P450 2C9                                         | 3    | 2    | 0.5      |

|             |                                                            |    |    |     |
|-------------|------------------------------------------------------------|----|----|-----|
| IPI00007411 | A-kinase anchor protein 11                                 | 6  | 6  | 0.5 |
| IPI00007884 | Myosin-reactive immunoglobulin light chain variable region | 15 | 13 | 0.5 |
| IPI00008603 | Actin, aortic smooth muscle                                | 3  | 2  | 0.5 |
| IPI00008787 | Alpha-N-acetylglucosaminidase precursor                    | 2  | 1  | 0.5 |
| IPI00008868 | Microtubule-associated protein 1B                          | 2  | 1  | 0.5 |
| IPI00009243 | Splice Isoform B of Leptin receptor                        | 2  | 1  | 0.5 |
| IPI00010200 | YTH domain containing 2                                    | 2  | 1  | 0.5 |
| IPI00011180 | Zinc finger and BTB domain containing protein 24           | 19 | 16 | 0.5 |
| IPI00013397 | KRAB box family protein                                    | 2  | 1  | 0.5 |
| IPI00013439 | Transcription factor jun-B                                 | 2  | 2  | 0.5 |
| IPI00013444 | Zinc finger protein 40                                     | 2  | 1  | 0.5 |
| IPI00013881 | Heterogeneous nuclear ribonucleoprotein H1                 | 3  | 3  | 0.5 |
| IPI00014829 | Cadherin protein                                           | 2  | 1  | 0.5 |
| IPI00015580 | Transducer of Cdc42-dependent actin assembly-1             | 2  | 1  | 0.5 |
| IPI00015593 | Zinc finger protein 294                                    | 2  | 2  | 0.5 |
| IPI00015785 | Crumbs protein homolog 1 precursor                         | 5  | 5  | 0.5 |
| IPI00015793 | Splice Isoform 1 of Telomerase-binding protein EST1A       | 2  | 1  | 0.5 |
| IPI00018305 | Insulin-like growth factor binding protein 3 precursor     | 2  | 2  | 0.5 |
| IPI00019038 | Lysozyme C precursor                                       | 10 | 9  | 0.5 |
| IPI00019350 | Dudulin 2, isoform b                                       | 6  | 6  | 0.5 |
| IPI00019447 | Conserved hypothetical protein                             | 4  | 4  | 0.5 |
| IPI00020356 | Microtubule-associated protein 1A                          | 2  | 1  | 0.5 |
| IPI00020926 | Homeobox protein Hox-A4                                    | 2  | 2  | 0.5 |

|             |                                                                           |    |    |     |
|-------------|---------------------------------------------------------------------------|----|----|-----|
| IPI00021033 | Collagen alpha 1(III) chain precursor                                     | 2  | 1  | 0.5 |
| IPI00021106 | Endonuclease G like 1                                                     | 2  | 1  | 0.5 |
| IPI00022086 | KIAA1325 protein                                                          | 2  | 2  | 0.5 |
| IPI00022333 | Brain-specific angiogenesis inhibitor 1                                   | 2  | 1  | 0.5 |
| IPI00022643 | Tripartite motif protein 36                                               | 4  | 4  | 0.5 |
| IPI00023339 | CREB-binding protein                                                      | 2  | 1  | 0.5 |
| IPI00023728 | Gamma-glutamyl hydrolase precursor                                        | 2  | 1  | 0.5 |
| IPI00023756 | Jumonji protein                                                           | 2  | 1  | 0.5 |
| IPI00024297 | Zinc finger X-linked protein ZXDB                                         | 2  | 2  | 0.5 |
| IPI00024382 | CLIP-associating protein 2                                                | 2  | 1  | 0.5 |
| IPI00024692 | Transforming growth factor-beta-inducible early growth response protein 2 | 2  | 1  | 0.5 |
| IPI00025753 | Desmoglein-1 precursor                                                    | 2  | 1  | 0.5 |
| IPI00026087 | Barrier-to-autointegration factor                                         | 2  | 1  | 0.5 |
| IPI00026230 | Heterogeneous nuclear ribonucleoprotein H'                                | 13 | 12 | 0.5 |
| IPI00027078 | Carboxypeptidase D precursor                                              | 2  | 1  | 0.5 |
| IPI00028348 | Splice Isoform A of Collagen alpha 6(IV) chain precursor                  | 2  | 1  | 0.5 |
| IPI00029061 | Selenoprotein P precursor                                                 | 3  | 2  | 0.5 |
| IPI00029768 | Glutamate [NMDA] receptor subunit epsilon 1 precursor                     | 2  | 2  | 0.5 |
| IPI00029966 | Hypothetical protein A-589H1.1                                            | 5  | 5  | 0.5 |
| IPI00031721 | KLHDC4 protein                                                            | 2  | 1  | 0.5 |
| IPI00032955 | Zinc finger protein 313                                                   | 2  | 2  | 0.5 |
| IPI00043430 | Hypothetical protein FLJ31400                                             | 3  | 2  | 0.5 |
| IPI00045512 | Hemicentin                                                                | 2  | 2  | 0.5 |
| IPI00061354 | Splice Isoform 2 of Bromodomain adjacent to zinc finger domain 2B         | 2  | 2  | 0.5 |

|             |                                                                    |    |   |     |
|-------------|--------------------------------------------------------------------|----|---|-----|
| IPI00063123 | 17 kDa protein                                                     | 2  | 2 | 0.5 |
| IPI00063780 | Hypothetical protein                                               | 2  | 1 | 0.5 |
| IPI00064667 | Glutamate carboxypeptidase-like protein 2 precursor                | 2  | 1 | 0.5 |
| IPI00064931 | Splice Isoform 2 of E1A binding protein                            | 2  | 2 | 0.5 |
| IPI00065388 | Novel protein                                                      | 3  | 2 | 0.5 |
| IPI00066333 | Anion transporter/exchanger-8                                      | 5  | 4 | 0.5 |
| IPI00074719 | KIAA1792 protein                                                   | 2  | 1 | 0.5 |
| IPI00102193 | Hypothetical protein FLJ25037                                      | 3  | 3 | 0.5 |
| IPI00102820 | AT2 receptor-interacting protein 1                                 | 2  | 2 | 0.5 |
| IPI00103480 | Membrane-bound phosphatidic acid-selective phospholipase A1        | 3  | 2 | 0.5 |
| IPI00103536 | Insulinoma-glucagonoma protein 20                                  | 10 | 8 | 0.5 |
| IPI00103552 | Ovarian cancer related tumor marker CA125                          | 5  | 4 | 0.5 |
| IPI00103655 | Splice Isoform Long of Autism susceptibility gene 2 protein        | 2  | 1 | 0.5 |
| IPI00107357 | CLPTM1 protein                                                     | 2  | 1 | 0.5 |
| IPI00152189 | Hypothetical protein                                               | 5  | 5 | 0.5 |
| IPI00152344 | Phosphatase, orphan 2                                              | 2  | 1 | 0.5 |
| IPI00155729 | Plexin B3 precursor                                                | 4  | 4 | 0.5 |
| IPI00160348 | Claspin                                                            | 2  | 1 | 0.5 |
| IPI00163956 | PREDICTED: similar to family with sequence similarity 35, member A | 2  | 1 | 0.5 |
| IPI00166584 | Soluble aminopeptidase P                                           | 3  | 3 | 0.5 |
| IPI00166873 | Chromosome 9 open reading frame 23                                 | 2  | 2 | 0.5 |
| IPI00168608 | Hypothetical protein LOC222967                                     | 3  | 2 | 0.5 |
| IPI00168884 | Renin receptor precursor                                           | 2  | 2 | 0.5 |
| IPI00169288 | Aldehyde dehydrogenase 1A2, isoform 2                              | 2  | 1 | 0.5 |

|             |                                                                          |    |   |     |
|-------------|--------------------------------------------------------------------------|----|---|-----|
| IPI00170593 | Cyclin-dependent kinase (CDC2-like) 11                                   | 2  | 1 | 0.5 |
| IPI00174756 | Ankyrin repeat domain protein 21                                         | 2  | 2 | 0.5 |
| IPI00174775 | Keratin 6 irs3                                                           | 10 | 8 | 0.5 |
| IPI00179016 | HypotHetical protein LOC9739                                             | 4  | 3 | 0.5 |
| IPI00179687 | Soluble interleukin-5 receptor precursor                                 | 2  | 1 | 0.5 |
| IPI00180305 | Retinoblastoma-associated factor 600                                     | 2  | 2 | 0.5 |
| IPI00181697 | ARAP1                                                                    | 2  | 1 | 0.5 |
| IPI00215899 | Splice Isoform 2 of Sushi repeat-containing protein SRPX precursor       | 2  | 2 | 0.5 |
| IPI00215995 | Splice Isoform Alpha-3A of Integrin alpha-3 precursor                    | 2  | 2 | 0.5 |
| IPI00216070 | Myosin light chain 1, skeletal muscle isoform                            | 2  | 2 | 0.5 |
| IPI00216560 | Cadherin related 23                                                      | 3  | 2 | 0.5 |
| IPI00217017 | Hypothetical protein FLJ39885                                            | 6  | 5 | 0.5 |
| IPI00217051 | Steerin3 protein                                                         | 2  | 1 | 0.5 |
| IPI00217052 | Steerin2 protein                                                         | 2  | 2 | 0.5 |
| IPI00217537 | Splice Isoform 1 of Putative Polycomb group protein ASXL1                | 3  | 2 | 0.5 |
| IPI00218725 | Laminin, alpha 2                                                         | 4  | 3 | 0.5 |
| IPI00218823 | Splice Isoform 1 of Myeloid/lymphoid or mixed-lineage leukemia protein 4 | 2  | 2 | 0.5 |
| IPI00218845 | Nitric-oxide synthase, endothelial                                       | 4  | 4 | 0.5 |
| IPI00219217 | L-lactate dehydrogenase B chain                                          | 5  | 4 | 0.5 |
| IPI00219430 | Thyroid hormone receptor-associated protein complex 100 kDa component    | 2  | 1 | 0.5 |
| IPI00219613 | Metalloprotease 1                                                        | 4  | 3 | 0.5 |
| IPI00220617 | Similar to 6-phosphofructokinase, liver type                             | 4  | 4 | 0.5 |
| IPI00220736 | SialidaSe 3                                                              | 2  | 1 | 0.5 |

|             |                                                                                  |     |     |     |
|-------------|----------------------------------------------------------------------------------|-----|-----|-----|
| IPI00220753 | Splice Isoform Short of Early growth response protein 2                          | 2   | 1   | 0.5 |
| IPI00221090 | Zinc finger homeobox 2                                                           | 5   | 5   | 0.5 |
| IPI00221234 | Aldehyde dehydrogenase family 7 member<br>PREDICTED: similar to protein tyrosine | 2   | 1   | 0.5 |
| IPI00232047 | phosphatase, receptor type, Q isoform 1 precursor                                | 4   | 3   | 0.5 |
| IPI00240432 | Splice Isoform A of Potential phospholipid-transporting ATPase VB                | 4   | 4   | 0.5 |
| IPI00241676 | FAT3                                                                             | 2   | 1   | 0.5 |
| IPI00243338 | Keratin 23 isoform b                                                             | 2   | 1   | 0.5 |
| IPI00243457 | 148 kDa protein                                                                  | 2   | 1   | 0.5 |
| IPI00255301 | OTTHUMP00000063615                                                               | 2   | 2   | 0.5 |
| IPI00259687 | Adenylate cyclase, type I                                                        | 8   | 7   | 0.5 |
| IPI00291815 | FBF1 protein                                                                     | 2   | 1   | 0.5 |
| IPI00291867 | Complement factor I precursor                                                    | 126 | 101 | 0.5 |
| IPI00292181 | Mitogen-activated protein kinase kinase kinase 12                                | 3   | 2   | 0.5 |
| IPI00292393 | Sodium channel protein type IV alpha subunit                                     | 2   | 1   | 0.5 |
| IPI00292532 | Antibacterial protein FALL-39 precursor                                          | 2   | 2   | 0.5 |
| IPI00292836 | OTTHUMP00000021741                                                               | 3   | 2   | 0.5 |
| IPI00293080 | Novel protein                                                                    | 2   | 1   | 0.5 |
| IPI00294008 | ZW10 interactor                                                                  | 2   | 1   | 0.5 |
| IPI00294891 | Proliferating-cell nucleolar antigen p120                                        | 2   | 1   | 0.5 |
| IPI00295376 | Solute carrier organic anion transporter family, member 1B1                      | 3   | 2   | 0.5 |
| IPI00295400 | Tryptophanyl-tRNA synthetase                                                     | 3   | 2   | 0.5 |

|             |                                                                                                                   |     |    |     |
|-------------|-------------------------------------------------------------------------------------------------------------------|-----|----|-----|
| IPI00296099 | Thrombospondin 1 precursor                                                                                        | 114 | 92 | 0.5 |
| IPI00296561 | Fibroblast growth factor receptor-like 1                                                                          | 2   | 2  | 0.5 |
| IPI00296840 | DNA polymerase iota                                                                                               | 2   | 1  | 0.5 |
| IPI00297550 | Coagulation factor XIII A chain precursor                                                                         | 2   | 1  | 0.5 |
| IPI00298964 | Hypothetical protein FLJ20166                                                                                     | 3   | 2  | 0.5 |
| IPI00299059 | Neural cell adhesion molecule                                                                                     | 10  | 8  | 0.5 |
| IPI00302835 | AT rich interactive domain 1B (SWI1-like)<br>isoform 3                                                            | 2   | 1  | 0.5 |
| IPI00303335 | Nebulin                                                                                                           | 2   | 2  | 0.5 |
| IPI00306929 | Splice Isoform 1 of Myosin XVIIIIB                                                                                | 3   | 3  | 0.5 |
| IPI00328125 | Superkiller viralicidic activity 2-like homolog                                                                   | 2   | 1  | 0.5 |
| IPI00329213 | SH2 containing inositol-5-phosphatase                                                                             | 2   | 1  | 0.5 |
| IPI00329482 | OTTHUMP00000040423                                                                                                | 3   | 2  | 0.5 |
| IPI00337602 | Zinc finger protein 326                                                                                           | 2   | 1  | 0.5 |
| IPI00373872 | Polycystic kidney disease 1-like 2                                                                                | 3   | 2  | 0.5 |
| IPI00374082 | C21orf258 protein                                                                                                 | 2   | 1  | 0.5 |
| IPI00375559 | Splice Isoform 1 of Otoferlin                                                                                     | 3   | 2  | 0.5 |
| IPI00376976 | Splice Isoform 1 of 130-kDa<br>phosphatidylinositol 4,5-biphosphate-<br>dependent ARF1 GTPase- activating protein | 2   | 1  | 0.5 |
| IPI00377041 | CUB and Sushi multiple domains 3 isoform 1                                                                        | 2   | 2  | 0.5 |
| IPI00377097 | PREDICTED: similar to bA110H4.2 (similar<br>to membrane protein)                                                  | 2   | 1  | 0.5 |
| IPI00382481 | Ig heavy chain V-III region BUT                                                                                   | 7   | 6  | 0.5 |
| IPI00382682 | Putative matrix cell adhesion molecule-3                                                                          | 3   | 3  | 0.5 |
| IPI00384746 | Copine-8                                                                                                          | 3   | 3  | 0.5 |

|             |                                                                |    |    |     |
|-------------|----------------------------------------------------------------|----|----|-----|
| IPI00386131 | Ig kappa chain V-III region IARC/BL41 precursor                | 13 | 11 | 0.5 |
| IPI00387022 | Ig kappa chain V-I region AG                                   | 3  | 2  | 0.5 |
| IPI00387101 | Ig kappa chain V-I region Scw                                  | 4  | 3  | 0.5 |
| IPI00387111 | PREDICTED: similar to Ig kappa chain                           | 22 | 18 | 0.5 |
| IPI00394855 | Hypothetical protein FLJ44112                                  | 2  | 2  | 0.5 |
| IPI00394958 | Splice Isoform 1 of Zona pellucida binding protein 2 precursor | 4  | 4  | 0.5 |
| IPI00395488 | Vasorin                                                        | 12 | 10 | 0.5 |
| IPI00396145 | FYVE finger-containing phosphoinositide                        | 2  | 2  | 0.5 |
| IPI00396421 | Hypothetical protein KIAA0776                                  | 4  | 4  | 0.5 |
| IPI00396470 | 46 kDa protein                                                 | 3  | 2  | 0.5 |
| IPI00397147 | PREDICTED: hypothetical protein                                | 2  | 1  | 0.5 |
| IPI00397163 | PREDICTED: hypothetical protein                                | 2  | 1  | 0.5 |
| IPI00397299 | PREDICTED: hypothetical protein                                | 2  | 1  | 0.5 |
| IPI00398007 | Ubiquitin specific protease 40                                 | 2  | 1  | 0.5 |
| IPI00398020 | PREDICTED: odz, odd Oz/ten-m homolog 3                         | 2  | 2  | 0.5 |
| IPI00399252 | JADE1L protein                                                 | 6  | 6  | 0.5 |
| IPI00400817 | PREDICTED: similar to dystrophin-like                          | 3  | 2  | 0.5 |
| IPI00401773 | Vacuolar protein sorting 37C                                   | 2  | 1  | 0.5 |
| IPI00410516 | Hypothetical protein FLJ45244                                  | 3  | 3  | 0.5 |
| IPI00412307 | Titin                                                          | 3  | 3  | 0.5 |
| IPI00412647 | Death receptor interacting protein                             | 2  | 1  | 0.5 |
| IPI00414101 | Splice Isoform 2 of DNA topoisomerase II, alpha isozyme        | 2  | 1  | 0.5 |
| IPI00418411 | Keratin 8 variant                                              | 20 | 17 | 0.5 |
| IPI00418630 | DNA polymerase sigma                                           | 2  | 1  | 0.5 |
| IPI00419509 | Novel protein                                                  | 2  | 1  | 0.5 |



|             |                                                                                         |      |      |     |
|-------------|-----------------------------------------------------------------------------------------|------|------|-----|
| IPI00430472 | Splice Isoform 1 of Activating signal cointegrator 1 complex subunit 3                  | 2    | 1    | 0.5 |
| IPI00440727 | Splice Isoform 1 of Bromodomain-containing protein 4                                    | 2    | 1    | 0.5 |
| IPI00443665 | Hypothetical protein FLJ46792                                                           | 2    | 1    | 0.5 |
| IPI00455117 | PREDICTED: hypothetical protein                                                         | 2    | 1    | 0.5 |
| IPI00455280 | PREDICTED: similar to carbonic anhydrase VA, mitochondrial precursor                    | 2    | 2    | 0.5 |
| IPI00457067 | PREDICTED: similar to scaffold attachment factor B                                      | 2    | 1    | 0.5 |
| IPI00465065 | Cytochrome P450 19A1                                                                    | 2    | 1    | 0.5 |
| IPI00465082 | Interleukin 31RA splice variant x3                                                      | 2    | 1    | 0.5 |
| IPI00470653 | Single-chain Fv                                                                         | 6    | 6    | 0.5 |
| IPI00472901 | Chromodomain heliCase DNA binding                                                       | 2    | 1    | 0.5 |
| IPI00477354 | 73 kDa protein                                                                          | 9    | 7    | 0.5 |
| IPI00477405 | Lung adenoma susceptibility 1-like protein                                              | 8    | 6    | 0.5 |
| IPI00479192 | 58 kDa protein                                                                          | 2    | 1    | 0.5 |
| IPI00514358 | PREDICTED: similar to TPTE and PTEN homologous inositol lipid phosphatase isoform alpha | 2    | 1    | 0.5 |
| IPI00514516 | OTTHUMP00000015995                                                                      | 3    | 3    | 0.5 |
| IPI00514616 | OTTHUMP00000031364                                                                      | 3    | 2    | 0.5 |
| IPI00552195 | IGLV2-14 protein                                                                        | 1652 | 1366 | 0.5 |
| IPI00553215 | V1-5 protein                                                                            | 5    | 5    | 0.5 |
| IPI00556128 | Hypothetical protein PREDICTED: hypothetical protein FLJ34222 variant                   | 3    | 2    | 0.5 |
| IPI00556386 | Insulin receptor substrate like protein                                                 | 2    | 1    | 0.5 |

|             |                                                                     |       |       |          |
|-------------|---------------------------------------------------------------------|-------|-------|----------|
| IPI00027507 | Complement factor H-related protein 3 precursor                     | 81    | 65    | 0.533312 |
| IPI00430842 | IGHA1 protein                                                       | 1628  | 1349  | 0.544133 |
| IPI00385555 | Ig kappa chain V-I region BAN                                       | 30    | 24    | 0.554113 |
| IPI00472226 | Ig alpha-1 chain C region                                           | 1627  | 1350  | 0.558743 |
| IPI00030205 | Ig kappa chain V-III region HAH precursor                           | 191   | 155   | 0.56455  |
| IPI00550584 | Ig alpha-1 chain C region                                           | 1629  | 1350  | 0.566008 |
| IPI00021817 | Vitamin K-dependent protein C precursor                             | 18    | 17    | 0.567247 |
| IPI00387026 | Ig kappa chain V-I region EU                                        | 18    | 17    | 0.567247 |
| IPI00053535 | PREDICTED: similar to ENSANGP00000013733                            | 16    | 15    | 0.571422 |
| IPI00022895 | Alpha-1B-glycoprotein precursor                                     | 762   | 623   | 0.575199 |
| IPI00003111 | Ig kappa chain V-I region AU                                        | 9     | 9     | 0.59177  |
| IPI00007899 | Single chain Fv                                                     | 9     | 9     | 0.59177  |
| IPI00032293 | Cystatin C precursor                                                | 8     | 8     | 0.59639  |
| IPI00103481 | Keratin protein K6irs                                               | 8     | 8     | 0.59639  |
| IPI00398220 | Myosin-reactive immunoglobulin light chain variable region          | 8     | 8     | 0.59639  |
| IPI00387113 | Ig kappa chain V-III region B6                                      | 7     | 7     | 0.601655 |
| IPI00470882 | Hypothetical protein DKFZp781D2453                                  | 7     | 7     | 0.601655 |
| IPI00216773 | ALB protein                                                         | 37818 | 32674 | 0.607138 |
| IPI00419453 | Ig kappa chain V-III region VG precursor                            | 67    | 55    | 0.608016 |
| IPI00012551 | Splice Isoform 3 of Protocadherin gamma A11 precursor               | 6     | 7     | 0.608866 |
| IPI00013944 | Splice Isoform C2 of Heterogeneous nuclear ribonucleoproteins C1/C2 | 6     | 7     | 0.608866 |
| IPI00293251 | Splice Isoform 6 of Bullous pemphigoid antigen 1, isoforms 6/9/10   | 6     | 7     | 0.608866 |

|             |                                                                                          |      |      |          |
|-------------|------------------------------------------------------------------------------------------|------|------|----------|
| IPI00386576 | Ig lambda chain V-IV region MOL                                                          | 6    | 7    | 0.608866 |
| IPI00032328 | Splice Isoform HMW of Kininogen precursor                                                | 263  | 215  | 0.60901  |
| IPI00011832 | Secreted phosphoprotein 24 precursor                                                     | 5    | 6    | 0.617756 |
| IPI00024661 | Protein transport protein Sec24C                                                         | 5    | 6    | 0.617756 |
| IPI00026337 | Splice Isoform 1 of Ran-binding protein 3                                                | 5    | 6    | 0.617756 |
| IPI00329775 | Splice Isoform 1 of Carboxypeptidase B2 precursor                                        | 5    | 6    | 0.617756 |
| IPI00333126 | Hypothetical protein DKFZp761L1518                                                       | 5    | 6    | 0.617756 |
| IPI00399193 | PREDICTED: similar to KIAA1501 protein                                                   | 5    | 6    | 0.617756 |
| IPI00477452 | 10 kDa protein                                                                           | 5    | 6    | 0.617756 |
| IPI00382497 | Ig heavy chain V-III region TUR                                                          | 190  | 157  | 0.62723  |
| IPI00013933 | Splice Isoform DPI of Desmoplakin                                                        | 4    | 5    | 0.629027 |
| IPI00029658 | Splice Isoform 1 of EGF-containing fibulin-like extracellular matrix protein 1 precursor | 4    | 5    | 0.629027 |
| IPI00398916 | PREDICTED: similar to RIKEN cDNA 3830422K02                                              | 4    | 5    | 0.629027 |
| IPI00555818 | 184 kDa protein                                                                          | 4    | 5    | 0.629027 |
| IPI00449920 | Hypothetical protein FLJ90170                                                            | 1634 | 1361 | 0.629886 |
| IPI00218413 | Biotinidase precursor                                                                    | 16   | 16   | 0.638498 |
| IPI00003369 | LIM domains containing protein 1                                                         | 3    | 4    | 0.643995 |
| IPI00009910 | Toll-like receptor 8 precursor                                                           | 3    | 4    | 0.643995 |
| IPI00014843 | OTTHUMP00000039401                                                                       | 3    | 4    | 0.643995 |
| IPI00022250 | Lymphocyte antigen 96 precursor                                                          | 3    | 4    | 0.643995 |
| IPI00022733 | Splice Isoform 1 of Phospholipid transfer protein precursor                              | 3    | 4    | 0.643995 |
| IPI00025276 | Splice Isoform XB of Tenascin-X precursor                                                | 3    | 4    | 0.643995 |
| IPI00027744 | Splice Isoform 1 of Mineralocorticoid                                                    | 3    | 4    | 0.643995 |
| IPI00152011 | PTPL1-associated RhoGAP                                                                  | 3    | 4    | 0.643995 |

|             |                                                                                            |     |     |          |
|-------------|--------------------------------------------------------------------------------------------|-----|-----|----------|
| IPI00154969 | LOC201175 protein                                                                          | 3   | 4   | 0.643995 |
| IPI00185659 | Aaa-protein                                                                                | 3   | 4   | 0.643995 |
| IPI00298971 | Vitronectin precursor                                                                      | 247 | 205 | 0.647745 |
| IPI00382478 | Ig heavy chain V-III region TIL                                                            | 232 | 194 | 0.651945 |
| IPI00008558 | Plasma kallikrein precursor                                                                | 122 | 104 | 0.656116 |
| IPI00375910 | Type I inner root sheath specific keratin 25                                               | 52  | 44  | 0.659925 |
| IPI00030739 | Apolipoprotein M                                                                           | 28  | 25  | 0.660809 |
| IPI00215894 | Splice Isoform LMW of Kininogen precursor                                                  | 263 | 216 | 0.66083  |
| IPI00473011 | Hemoglobin delta chain                                                                     | 373 | 311 | 0.664097 |
| IPI00004859 | Bloom's syndrome protein                                                                   | 2   | 3   | 0.665289 |
| IPI00009815 | Hypothetical protein                                                                       | 2   | 3   | 0.665289 |
| IPI00011694 | Trypsin I precursor                                                                        | 2   | 3   | 0.665289 |
| IPI00021812 | Neuroblast differentiation associated protein<br>AHNAK                                     | 2   | 3   | 0.665289 |
| IPI00029819 | Neurogenic locus notch homolog protein 3<br>precursor                                      | 2   | 3   | 0.665289 |
| IPI00060474 | Hypothetical protein MGC20806                                                              | 2   | 3   | 0.665289 |
| IPI00073772 | Fructose-1,6-bisphosphatase                                                                | 2   | 3   | 0.665289 |
| IPI00160479 | Hypothetical protein DKFZp313B2333                                                         | 2   | 3   | 0.665289 |
| IPI00179694 | Klotho beta like protein                                                                   | 2   | 3   | 0.665289 |
| IPI00185362 | Neural cell adhesion molecule 1                                                            | 2   | 3   | 0.665289 |
| IPI00218795 | L-selectin precursor                                                                       | 2   | 3   | 0.665289 |
| IPI00297084 | Dolichyl-diphosphooligosaccharide--protein<br>glycosyltransferase 48 kDa subunit precursor | 2   | 3   | 0.665289 |
| IPI00303343 | Serine arginine-rich pre-mRNA splicing<br>factor SR-A1                                     | 2   | 3   | 0.665289 |
| IPI00328793 | Sterol regulatory element binding protein-2                                                | 2   | 3   | 0.665289 |
| IPI00375676 | Ferritin light chain                                                                       | 2   | 3   | 0.665289 |

|             |                                                            |      |      |          |
|-------------|------------------------------------------------------------|------|------|----------|
| IPI00382426 | Ig lambda chain V-II region TRO                            | 2    | 3    | 0.665289 |
| IPI00418262 | Fructose-bisphosphate aldolase C                           | 2    | 3    | 0.665289 |
| IPI00470896 | Hypothetical protein DKFZp781H1112                         | 2    | 3    | 0.665289 |
| IPI00479981 | 12 kDa protein                                             | 2    | 3    | 0.665289 |
| IPI00552854 | Hypothetical protein                                       | 1604 | 1344 | 0.672068 |
| IPI00002773 | Splice Isoform 2 of Tyrosine-protein kinase JAK3           | 9    | 10   | 0.674943 |
| IPI00022394 | Complement C1q subcomponent, C chain precursor             | 125  | 107  | 0.678366 |
| IPI00456772 | Hypothetical protein                                       | 1667 | 1426 | 0.680994 |
| IPI00019580 | Plasminogen precursor                                      | 1105 | 919  | 0.681003 |
| IPI00005721 | Neutrophil defensin 1 precursor                            | 8    | 9    | 0.682973 |
| IPI00550232 | CMYA3                                                      | 8    | 9    | 0.682973 |
| IPI00385507 | V1-16 protein                                              | 19   | 19   | 0.685262 |
| IPI00186903 | Splice Isoform 2 of Apolipoprotein-L1 precursor            | 56   | 48   | 0.689047 |
| IPI00027547 | Dermcidin precursor                                        | 7    | 8    | 0.692005 |
| IPI00007240 | Coagulation factor XIII B chain precursor                  | 76   | 65   | 0.695261 |
| IPI00166866 | MGC27165 protein                                           | 1638 | 1377 | 0.696345 |
| IPI00473015 | Similar to SNC66 protein                                   | 1501 | 1260 | 0.697767 |
| IPI00000897 | Potential helicase with zinc-finger domain                 | 1    | 2    | 0.699219 |
| IPI00002260 | Hypothetical protein FLJ11715                              | 1    | 2    | 0.699219 |
| IPI00005635 | Tubulin tyrosine ligase-like protein 4                     | 1    | 2    | 0.699219 |
| IPI00005918 | Alpha-methylacyl-CoA racemase                              | 1    | 2    | 0.699219 |
| IPI00008225 | Gamma-aminobutyric-acid receptor alpha-4 subunit precursor | 1    | 2    | 0.699219 |
| IPI00008456 | Splice Isoform HSF4B of Heat shock factor protein 4        | 1    | 2    | 0.699219 |

|             |                                                                                               |   |   |          |
|-------------|-----------------------------------------------------------------------------------------------|---|---|----------|
| IPI00012269 | Multimerin 1 precursor                                                                        | 1 | 2 | 0.699219 |
| IPI00013508 | Alpha-actinin 1                                                                               | 1 | 2 | 0.699219 |
| IPI00013988 | Rho-GTPase-activating protein 5                                                               | 1 | 2 | 0.699219 |
| IPI00018370 | Splice Isoform 2 of Supervillin                                                               | 1 | 2 | 0.699219 |
| IPI00020416 | Tripeptidyl peptidase II                                                                      | 1 | 2 | 0.699219 |
| IPI00022264 | Zinc finger protein 297B                                                                      | 1 | 2 | 0.699219 |
| IPI00027174 | Splice Isoform 1 of Fibroblast growth factor receptor 3 precursor                             | 1 | 2 | 0.699219 |
| IPI00027487 | Creatine kinase, M chain                                                                      | 1 | 2 | 0.699219 |
| IPI00028031 | Splice Isoform 1 of Acyl-CoA dehydrogenase, very-long-chain specific, mitochondrial precursor | 1 | 2 | 0.699219 |
| IPI00028957 | Splice Isoform 2 of Ubiquitin conjugation factor E4 A                                         | 1 | 2 | 0.699219 |
| IPI00029700 | Splice Isoform Long of Down syndrome cell adhesion molecule precursor                         | 1 | 2 | 0.699219 |
| IPI00031008 | Splice Isoform 1 of Tenascin precursor                                                        | 1 | 2 | 0.699219 |
| IPI00037283 | Splice Isoform 5 of Dynamin 1-like protein                                                    | 1 | 2 | 0.699219 |
| IPI00064741 | Leishmanolysin-like peptidase, variant 1                                                      | 1 | 2 | 0.699219 |
| IPI00064745 | Splice Isoform 1 of Phosphatase and actin regulator 3                                         | 1 | 2 | 0.699219 |
| IPI00074715 | PREDICTED: similar to homeobox protein NKX2-6                                                 | 1 | 2 | 0.699219 |
| IPI00100867 | Transcription initiation factor TFIID 210 kDa subunit                                         | 1 | 2 | 0.699219 |
| IPI00102677 | Splice Isoform 1 of Dual specificity testis-specific protein kinase 2                         | 1 | 2 | 0.699219 |

|             |                                                           |   |   |          |
|-------------|-----------------------------------------------------------|---|---|----------|
| IPI00103182 | FKBP6-like                                                | 1 | 2 | 0.699219 |
| IPI00105532 | LLGL protein                                              | 1 | 2 | 0.699219 |
| IPI00141118 | EPC2 protein                                              | 1 | 2 | 0.699219 |
| IPI00165086 | Zinc finger protein 37a                                   | 1 | 2 | 0.699219 |
| IPI00166184 | Hypothetical protein FLJ40584                             | 1 | 2 | 0.699219 |
| IPI00168554 | Sulfiredoxin                                              | 1 | 2 | 0.699219 |
| IPI00171636 | Neuron navigator 1                                        | 1 | 2 | 0.699219 |
| IPI00175202 | Zinc finger protein 433                                   | 1 | 2 | 0.699219 |
| IPI00175295 | PREDICTED: DKFZP586J0619 protein                          | 1 | 2 | 0.699219 |
| IPI00184546 | Hypothetical protein MGC17943                             | 1 | 2 | 0.699219 |
| IPI00216815 | Splice Isoform 2 of DNA topoisomerase III beta-1          | 1 | 2 | 0.699219 |
| IPI00217690 | Hypothetical protein MGC42105                             | 1 | 2 | 0.699219 |
| IPI00218539 | Splice Isoform B of Collagen alpha 1(XI) chain precursor  | 1 | 2 | 0.699219 |
| IPI00248359 | PREDICTED: similar to POTE2A                              | 1 | 2 | 0.699219 |
| IPI00299111 | Testicular soluble adenylyl cyclase                       | 1 | 2 | 0.699219 |
| IPI00299524 | Condensin subunit 1                                       | 1 | 2 | 0.699219 |
| IPI00306532 | PREDICTED: similar to KIAA1783 protein                    | 1 | 2 | 0.699219 |
| IPI00335509 | Dihydropyrimidinase related protein-5                     | 1 | 2 | 0.699219 |
| IPI00337315 | Retinoblastoma binding protein 6 isoform 1                | 1 | 2 | 0.699219 |
| IPI00337657 | Nephrocystin 3                                            | 1 | 2 | 0.699219 |
| IPI00375638 | KIAA0685 gene product                                     | 1 | 2 | 0.699219 |
| IPI00382490 | Ig heavy chain V-III region BUR                           | 1 | 2 | 0.699219 |
| IPI00383775 | 199G4 protein                                             | 1 | 2 | 0.699219 |
| IPI00387096 | Ig kappa chain V-I region Kue                             | 1 | 2 | 0.699219 |
| IPI00396627 | Splice Isoform 1 of Zinc phosphodiesterase ELAC protein 2 | 1 | 2 | 0.699219 |

|             |                                                                        |      |      |          |
|-------------|------------------------------------------------------------------------|------|------|----------|
| IPI00397904 | Nuclear pore complex protein Nup93                                     | 1    | 2    | 0.699219 |
| IPI00410060 | Hepatocellular carcinoma-associated antigen                            | 1    | 2    | 0.699219 |
| IPI00410150 | Usher syndrome 2A isoform B                                            | 1    | 2    | 0.699219 |
| IPI00414095 | Eukaryotic translation initiation factor 4E<br>nuclear import factor 1 | 1    | 2    | 0.699219 |
| IPI00432655 | PYST9371                                                               | 1    | 2    | 0.699219 |
| IPI00444845 | Hypothetical protein FLJ45122                                          | 1    | 2    | 0.699219 |
| IPI00449923 | Splice Isoform 1 of Retinoic acid induced<br>protein 1                 | 1    | 2    | 0.699219 |
| IPI00465430 | G22P1 protein                                                          | 1    | 2    | 0.699219 |
| IPI00472882 | HLA class I histocompatibility antigen, A-68<br>alpha chain precursor  | 1    | 2    | 0.699219 |
| IPI00477279 | 21 kDa protein                                                         | 1    | 2    | 0.699219 |
| IPI00477880 | Nebulin-related anchoring protein                                      | 1    | 2    | 0.699219 |
| IPI00479883 | 12 kDa protein                                                         | 1    | 2    | 0.699219 |
| IPI00513917 | Sorbin and SH3 domain containing 1                                     | 1    | 2    | 0.699219 |
| IPI00514729 | Dehydrodolichyl diphosphate synthase                                   | 1    | 2    | 0.699219 |
| IPI00552701 | Discs, large homolog 3                                                 | 1    | 2    | 0.699219 |
| IPI00384931 | Hypothetical protein                                                   | 1971 | 1740 | 0.706917 |
| IPI00514982 | 13 kDa protein                                                         | 26   | 24   | 0.714682 |
| IPI00296165 | Complement C1r subcomponent precursor                                  | 289  | 239  | 0.715797 |
| IPI00027462 | Calgranulin B                                                          | 5    | 7    | 0.717561 |
| IPI00168218 | Hypothetical protein FLJ33718                                          | 21   | 21   | 0.732695 |
| IPI00220594 | Splice Isoform 4 of Intersectin 1                                      | 21   | 21   | 0.732695 |
| IPI00029699 | Ribonuclease 4 precursor                                               | 4    | 6    | 0.735107 |
| IPI00165319 | PREDICTED: FLJ46675 protein                                            | 19   | 20   | 0.739679 |
| IPI00028030 | Cartilage oligomeric matrix protein precursor                          | 16   | 18   | 0.753625 |



|             |                                                                    |      |      |          |
|-------------|--------------------------------------------------------------------|------|------|----------|
| IPI00007893 | Myosin-reactive immunoglobulin heavy chain variable region         | 8    | 10   | 0.757217 |
| IPI00003469 | Ig kappa chain V-I region WEA                                      | 3    | 5    | 0.757258 |
| IPI00374371 | Hypothetical protein FLJ40392                                      | 3    | 5    | 0.757258 |
| IPI00454729 | PREDICTED: similar to putative scaffolding protein POSH            | 3    | 5    | 0.757258 |
| IPI00456373 | Splice Isoform 2 of Homeobox protein Meis3                         | 3    | 5    | 0.757258 |
| IPI00465264 | NOD9                                                               | 3    | 5    | 0.757258 |
| IPI00218746 | Complement Component 1, q subComponent, beta polypeptide preCursor | 109  | 95   | 0.759917 |
| IPI00553170 | IGLV3-21 protein                                                   | 1655 | 1427 | 0.760221 |
| IPI00398992 | Hypothetical protein DKFZp686N17164                                | 15   | 17   | 0.761325 |
| IPI00387095 | Ig kappa chain V-I region Ka                                       | 7    | 9    | 0.768331 |
| IPI00029193 | Hepatocyte growth factor activator precursor                       | 22   | 22   | 0.774474 |
| IPI00553177 | Alpha-1-antitrypsin precursor                                      | 5587 | 4890 | 0.778519 |
| IPI00024138 | Ig kappa chain V-III region VH precursor                           | 12   | 15   | 0.779538 |
| IPI00017746 | BRCA1-associated RING domain protein 1                             | 2    | 4    | 0.786484 |
| IPI00030466 | PREDICTED: putative ankyrin-repeat containing protein              | 2    | 4    | 0.786484 |
| IPI00040638 | Leukocyte immunoglobulin-like receptor, subfamily A, member 5      | 2    | 4    | 0.786484 |
| IPI00299608 | Splice Isoform 1 of 26S proteasome non-ATPase regulatory subunit 1 | 2    | 4    | 0.786484 |
| IPI00455528 | PREDICTED: similar to hypothetical protein                         | 2    | 4    | 0.786484 |
| IPI00294395 | Complement component C8 beta chain precursor                       | 123  | 109  | 0.786619 |
| IPI00376379 | Keratin 1B                                                         | 82   | 75   | 0.789785 |
| IPI00385143 | Microfibrillar protein 2                                           | 28   | 27   | 0.791562 |

|             |                                                                            |      |      |          |
|-------------|----------------------------------------------------------------------------|------|------|----------|
| IPI00003470 | Ig kappa chain V-I region Wes                                              | 5    | 8    | 0.797389 |
| IPI00008554 | Angiogenin precursor                                                       | 5    | 8    | 0.797389 |
| IPI00384398 | Myosin-reactive immunoglobulin light chain variable region                 | 5    | 8    | 0.797389 |
| IPI00013438 | Immunoglobulin lambda-like polypeptide 1 precursor                         | 10   | 13   | 0.797663 |
| IPI00299778 | Serum paraoxonase/lactonase 3                                              | 10   | 13   | 0.797663 |
| IPI00006154 | Splice Isoform Long of Complement factor H-related protein 2 precursor     | 44   | 42   | 0.808404 |
| IPI00020091 | Alpha-1-acid glycoprotein 2 precursor                                      | 156  | 138  | 0.81122  |
| IPI00023217 | Splice Isoform 1 of Ryanodine receptor 2                                   | 4    | 7    | 0.816866 |
| IPI00448985 | Hypothetical protein                                                       | 4622 | 4067 | 0.826145 |
| IPI00550640 | IGHG4 protein                                                              | 4893 | 4303 | 0.827524 |
| IPI00001790 | Hypothetical protein FLJ12906                                              | 1    | 3    | 0.827578 |
| IPI00001952 | Probable endonuclease KIAA0830 precursor                                   | 1    | 3    | 0.827578 |
| IPI00002335 | Huntingtin                                                                 | 1    | 3    | 0.827578 |
| IPI00006931 | CGI-72 protein                                                             | 1    | 3    | 0.827578 |
| IPI00006987 | ATP-dependent RNA helicase DDX24                                           | 1    | 3    | 0.827578 |
| IPI00007868 | Myosin-reactive immunoglobulin light chain variable region                 | 1    | 3    | 0.827578 |
| IPI00017538 | Splice Isoform 2 of Separin                                                | 1    | 3    | 0.827578 |
| IPI00018177 | Hypothetical protein FLJ10408                                              | 1    | 3    | 0.827578 |
| IPI00020153 | Bassoon protein                                                            | 1    | 3    | 0.827578 |
| IPI00024317 | Splice Isoform Long of Glutaryl-CoA dehydrogenase, mitochondrial precursor | 1    | 3    | 0.827578 |
| IPI00024887 | Bone morphogenetic protein 6 precursor                                     | 1    | 3    | 0.827578 |
| IPI00026108 | Cytosolic phospholipase A2                                                 | 1    | 3    | 0.827578 |
| IPI00028307 | Hypothetical protein FLJ22346                                              | 1    | 3    | 0.827578 |

|             |                                                                                                                              |      |      |          |
|-------------|------------------------------------------------------------------------------------------------------------------------------|------|------|----------|
| IPI00094740 | Splice Isoform 1 of RING finger protein 31                                                                                   | 1    | 3    | 0.827578 |
| IPI00171525 | Sentrin-specific protease 3                                                                                                  | 1    | 3    | 0.827578 |
| IPI00178352 | Splice Isoform 1 of Filamin C                                                                                                | 1    | 3    | 0.827578 |
| IPI00186460 | Alpha 1 type II collAgen isoform 2, preproprotein                                                                            | 1    | 3    | 0.827578 |
| IPI00217804 | Hypothetical protein FLJ10260                                                                                                | 1    | 3    | 0.827578 |
| IPI00219299 | Talin 2                                                                                                                      | 1    | 3    | 0.827578 |
| IPI00298301 | Myosin heavy chain, fast skeletal muscle, embryonic                                                                          | 1    | 3    | 0.827578 |
| IPI00299512 | Splice Isoform 2 of Neurofibromin                                                                                            | 1    | 3    | 0.827578 |
| IPI00375220 | Splice Isoform 1 of Nance-Horan syndrome protein                                                                             | 1    | 3    | 0.827578 |
| IPI00376251 | PREDICTED: similar to Solute carrier family 2, facilitated glucose transporter, member 3 (Glucose transporter type 3, brain) | 1    | 3    | 0.827578 |
| IPI00377006 | Sodium channel protein type V alpha subunit                                                                                  | 1    | 3    | 0.827578 |
| IPI00385631 | Zinc finger, ZZ-type with EF hand domain 1                                                                                   | 1    | 3    | 0.827578 |
| IPI00402580 | PREDICTED: hypothetical protein                                                                                              | 1    | 3    | 0.827578 |
| IPI00454961 | PREDICTED: KIAA0415 gene product                                                                                             | 1    | 3    | 0.827578 |
| IPI00457080 | PREDICTED: similar to submaxillary                                                                                           | 1    | 3    | 0.827578 |
| IPI00555887 | Ring fingeR pRotein 31                                                                                                       | 1    | 3    | 0.827578 |
| IPI00063408 | Dehydrogenase E1 and transketolase domain containing protein 1                                                               | 7    | 10   | 0.830072 |
| IPI00023673 | Galectin-3 binding protein precursor                                                                                         | 35   | 34   | 0.835081 |
| IPI00549747 | Hypothetical protein                                                                                                         | 4623 | 4071 | 0.836924 |
| IPI00384400 | Myosin-reactive immunoglobulin heavy chain variable region                                                                   | 66   | 61   | 0.837601 |

|             |                                                                          |      |      |          |
|-------------|--------------------------------------------------------------------------|------|------|----------|
| IPI00166612 | Cardiomyopathy associated 5                                              | 3    | 6    | 0.840168 |
| IPI00328894 | Hypothetical protein                                                     | 3    | 6    | 0.840168 |
| IPI00292946 | Thyroxine-binding globulin precursor                                     | 16   | 20   | 0.842511 |
| IPI00043069 | Breast cancer antigen NY-BR-1                                            | 6    | 9    | 0.842805 |
| IPI00299435 | Apolipoprotein F precursor                                               | 6    | 9    | 0.842805 |
| IPI00384406 | Myosin-reactive immunoglobulin heavy chain variable region               | 87   | 81   | 0.844427 |
| IPI00291262 | Clusterin precursor                                                      | 250  | 218  | 0.847309 |
| IPI00430808 | Hypothetical protein                                                     | 4635 | 4087 | 0.851983 |
| IPI00555872 | Myosin-reactive immunoglobulin heavy chain variable region               | 303  | 266  | 0.863951 |
| IPI00479553 | 11 kDa protein                                                           | 302  | 264  | 0.864583 |
| IPI00384392 | Myosin-reactive immunoglobulin heavy chain variable region               | 300  | 262  | 0.865603 |
| IPI00440577 | Hypothetical protein                                                     | 4470 | 3950 | 0.868276 |
| IPI00006515 | Splice Isoform 1 of Potassium voltage-gated channel subfamily H member 6 | 2    | 5    | 0.86865  |
| IPI00012792 | Vascular endothelial-cadherin precursor                                  | 2    | 5    | 0.86865  |
| IPI00021885 | Splice Isoform Alpha-E of Fibrinogen alpha/alpha-E chain precursor       | 2    | 5    | 0.86865  |
| IPI00160265 | Splice Isoform 2 of Trinucleotide repeat-containing gene 6A protein      | 2    | 5    | 0.86865  |
| IPI00550048 | Similar to Ig kappa chain V-IV region B17 precursor                      | 3638 | 3224 | 0.870499 |
| IPI00550731 | Hypothetical protein                                                     | 4472 | 3952 | 0.870537 |
| IPI00019581 | Coagulation factor XII precursor                                         | 93   | 86   | 0.871382 |
| IPI00554675 | Anti-RhD monoclonal T125 kappa light chain precursor                     | 4387 | 3879 | 0.87278  |

|             |                                                                                              |      |      |          |
|-------------|----------------------------------------------------------------------------------------------|------|------|----------|
| IPI00477069 | 10 kDa protein                                                                               | 299  | 261  | 0.875015 |
| IPI00513925 | Complement factor H-related 1                                                                | 66   | 63   | 0.875888 |
| IPI00004962 | 130 kD Golgi-localized phosphoprotein                                                        | 11   | 16   | 0.876775 |
| IPI00414037 | Myosin tail domain-containing protein                                                        | 7    | 11   | 0.878179 |
| IPI00419424 | IGKV1-5 protein                                                                              | 4464 | 3952 | 0.886142 |
| IPI00385058 | Hypothetical protein                                                                         | 4447 | 3937 | 0.886576 |
| IPI00022417 | Leucine-rich alpha-2-glycoprotein precursor                                                  | 113  | 109  | 0.888383 |
| IPI00455228 | PREDICTED: similar to hect domain and RLD 2                                                  | 6    | 10   | 0.890042 |
| IPI00000775 | Splice Isoform 1 of Leucine-rich repeats and immunoglobulin-like domains protein 1 precursor | 0    | 2    | 0.891244 |
| IPI00000846 | Splice Isoform 1 of Chromodomain helicase-DNA-binding protein 4                              | 0    | 2    | 0.891244 |
| IPI00000977 | Serine/threonine protein kinase                                                              | 0    | 2    | 0.891244 |
| IPI00001342 | NY-REN-24 antigen                                                                            | 0    | 2    | 0.891244 |
| IPI00001434 | Protocadherin beta 14 precursor                                                              | 0    | 2    | 0.891244 |
| IPI00001737 | Homeobox protein GSH-2                                                                       | 0    | 2    | 0.891244 |
| IPI00001758 | Outer dense fiber of sperm tails 2                                                           | 0    | 2    | 0.891244 |
| IPI00002180 | PREDICTED: KIAA1383 protein                                                                  | 0    | 2    | 0.891244 |
| IPI00002283 | PREDICTED: KIAA1337 protein                                                                  | 0    | 2    | 0.891244 |
| IPI00002707 | Splice Isoform 1 of Spastin                                                                  | 0    | 2    | 0.891244 |
| IPI00003148 | Splice Isoform Alpha-1 of Mitogen-activated protein kinase 10                                | 0    | 2    | 0.891244 |
| IPI00003515 | Thyroid receptor interacting protein 11                                                      | 0    | 2    | 0.891244 |
| IPI00004247 | Splice Isoform 1 of Phosphorylase b kinase alpha regulatory chain, skeletal muscle           | 0    | 2    | 0.891244 |

|             |                                                                                     |   |   |          |
|-------------|-------------------------------------------------------------------------------------|---|---|----------|
| IPI00005030 | BOG25                                                                               | 0 | 2 | 0.891244 |
| IPI00005036 | RNA-binding protein 5                                                               | 0 | 2 | 0.891244 |
| IPI00005126 | Ephrin-B2 precursor                                                                 | 0 | 2 | 0.891244 |
| IPI00005541 | PMS1 protein homolog 1                                                              | 0 | 2 | 0.891244 |
| IPI00005781 | Splice Isoform A of Arachidonate 15-lipoxygenase, type II                           | 0 | 2 | 0.891244 |
| IPI00006130 | Protein KIAA0494                                                                    | 0 | 2 | 0.891244 |
| IPI00006994 | Kelch-like protein 21                                                               | 0 | 2 | 0.891244 |
| IPI00007960 | Splice Isoform 1 of Periostin precursor                                             | 0 | 2 | 0.891244 |
| IPI00008115 | Splice Isoform 1 of Mitogen-activated protein kinase kinase kinase 9                | 0 | 2 | 0.891244 |
| IPI00008269 | Hypothetical protein FLJ16174                                                       | 0 | 2 | 0.891244 |
| IPI00008542 | F-box only protein 28                                                               | 0 | 2 | 0.891244 |
| IPI00010163 | Zinc finger protein 286                                                             | 0 | 2 | 0.891244 |
| IPI00011062 | Splice Isoform 1 of Carbamoyl-phosphate synthase [ammonia], mitochondrial precursor | 0 | 2 | 0.891244 |
| IPI00011063 | Neurotrypsin precursor                                                              | 0 | 2 | 0.891244 |
| IPI00011218 | Macrophage colony stimulating factor I receptor precursor                           | 0 | 2 | 0.891244 |
| IPI00011232 | KIAA1536 protein                                                                    | 0 | 2 | 0.891244 |
| IPI00011689 | Elongation factor 2 kinase                                                          | 0 | 2 | 0.891244 |
| IPI00011757 | RNA polymerase II elongation factor ELL2                                            | 0 | 2 | 0.891244 |
| IPI00011805 | Neuralized-like protein 2                                                           | 0 | 2 | 0.891244 |
| IPI00012094 | Splice Isoform Long of Probable ubiquitin carboxyl-terminal hydrolase FAF-Y         | 0 | 2 | 0.891244 |
| IPI00012995 | Pre-mRNA cleavage factor I 25 kDa subunit                                           | 0 | 2 | 0.891244 |
| IPI00014572 | SPARC precursor                                                                     | 0 | 2 | 0.891244 |
| IPI00014878 | Protein kinase C, mu type                                                           | 0 | 2 | 0.891244 |

|             |                                                                           |   |   |          |
|-------------|---------------------------------------------------------------------------|---|---|----------|
| IPI00016347 | Hypothetical protein                                                      | 0 | 2 | 0.891244 |
| IPI00016431 | Hypothetical protein FLJ23556                                             | 0 | 2 | 0.891244 |
| IPI00017382 | ETS translocation variant 4                                               | 0 | 2 | 0.891244 |
| IPI00017730 | Mothers against decapentaplegic homolog 5                                 | 0 | 2 | 0.891244 |
| IPI00018415 | Transmembrane 9 superfamily protein member 2 precursor                    | 0 | 2 | 0.891244 |
| IPI00020546 | Ash1                                                                      | 0 | 2 | 0.891244 |
| IPI00020557 | Low-density lipoprotein receptor-related protein 1 precursor              | 0 | 2 | 0.891244 |
| IPI00020900 | Splice Isoform 1 of Zinc finger protein 41                                | 0 | 2 | 0.891244 |
| IPI00020920 | Adenylate cyclase, type VII                                               | 0 | 2 | 0.891244 |
| IPI00021075 | Splice Isoform 1 of Large neutral amino acids transporter small subunit 3 | 0 | 2 | 0.891244 |
| IPI00022143 | Family with sequence similarity 62 (C2 domain containing), member A       | 0 | 2 | 0.891244 |
| IPI00022462 | Transferrin receptor protein 1                                            | 0 | 2 | 0.891244 |
| IPI00022479 | P532                                                                      | 0 | 2 | 0.891244 |
| IPI00023549 | HSPC159 protein                                                           | 0 | 2 | 0.891244 |
| IPI00023630 | Splice Isoform 1 of Apoptotic protease activating factor 1                | 0 | 2 | 0.891244 |
| IPI00024214 | Splice Isoform 1 of Telomeric repeat binding factor 2                     | 0 | 2 | 0.891244 |
| IPI00024272 | Integral membrane protein DGCR2/IDD precursor                             | 0 | 2 | 0.891244 |
| IPI00024417 | Huntingtin interacting protein 1 related                                  | 0 | 2 | 0.891244 |
| IPI00024524 | Putative 28 kDa protein                                                   | 0 | 2 | 0.891244 |
| IPI00024700 | HERV-H LTR-associating 1                                                  | 0 | 2 | 0.891244 |

|             |                                                                                |   |   |          |
|-------------|--------------------------------------------------------------------------------|---|---|----------|
| IPI00024714 | Splice Isoform 1 of Regulator of G-protein signaling 12                        | 0 | 2 | 0.891244 |
| IPI00024934 | Methylmalonyl-CoA mutase, mitochondrial precursor                              | 0 | 2 | 0.891244 |
| IPI00026183 | Small inducible cytokine A18 precursor                                         | 0 | 2 | 0.891244 |
| IPI00026828 | Splice Isoform 1 of Tripartite motif protein 9                                 | 0 | 2 | 0.891244 |
| IPI00027232 | Insulin-like growth factor I receptor                                          | 0 | 2 | 0.891244 |
| IPI00027251 | Serine/threonine-protein kinase 38                                             | 0 | 2 | 0.891244 |
| IPI00027801 | Hypothetical protein DKFZp434O1826                                             | 0 | 2 | 0.891244 |
| IPI00027875 | Synaptotagmin-11                                                               | 0 | 2 | 0.891244 |
| IPI00028484 | Splice Isoform 1 of Neuropsin precursor                                        | 0 | 2 | 0.891244 |
| IPI00031506 | Potassium/sodium hyperpolarization-activated cyclic nucleotide-gated channel 1 | 0 | 2 | 0.891244 |
| IPI00031519 | Splice Isoform 1 of DNA                                                        | 0 | 2 | 0.891244 |
| IPI00031557 | Splice Isoform 1 of Cystathionine gamma-                                       | 0 | 2 | 0.891244 |
| IPI00032144 | LIM/homeobox protein Lhx2                                                      | 0 | 2 | 0.891244 |
| IPI00032333 | Splice Isoform 1 of Receptor-type tyrosine-protein phosphatase alpha precursor | 0 | 2 | 0.891244 |
| IPI00034308 | Sarcosine dehydrogenase, mitochondrial precursor                               | 0 | 2 | 0.891244 |
| IPI00044749 | Splice Isoform 1 of Serine/threonine-protein kinase Nek1                       | 0 | 2 | 0.891244 |
| IPI00044751 | M-phase phosphoprotein 1                                                       | 0 | 2 | 0.891244 |
| IPI00044891 | Adaptor molecule-1                                                             | 0 | 2 | 0.891244 |
| IPI00045856 | Hypothetical protein FLJ14717                                                  | 0 | 2 | 0.891244 |
| IPI00058961 | 49 kDa protein                                                                 | 0 | 2 | 0.891244 |
| IPI00064200 | MasterMind-like 2                                                              | 0 | 2 | 0.891244 |
| IPI00065057 | Hypothetical protein FLJ25444                                                  | 0 | 2 | 0.891244 |



|             |                                                                              |   |   |          |
|-------------|------------------------------------------------------------------------------|---|---|----------|
| IPI00072534 | SMAP-1b                                                                      | 0 | 2 | 0.891244 |
| IPI00098988 | Hypothetical protein DKFZp434C196                                            | 0 | 2 | 0.891244 |
| IPI00102107 | Splice Isoform 1 of Nuclear receptor binding SET domain containing protein 1 | 0 | 2 | 0.891244 |
| IPI00102377 | Ankyrin repeat domain 27                                                     | 0 | 2 | 0.891244 |
| IPI00152615 | Alpha3-fucosyltransferase                                                    | 0 | 2 | 0.891244 |
| IPI00152639 | ADAMTS-19 precursor                                                          | 0 | 2 | 0.891244 |
| IPI00154910 | Cbl-interacting protein Sts-1 variant                                        | 0 | 2 | 0.891244 |
| IPI00164610 | TBC1 domain family member 1                                                  | 0 | 2 | 0.891244 |
| IPI00165979 | OTTHUMP00000040002                                                           | 0 | 2 | 0.891244 |
| IPI00167399 | Hypothetical protein FLJ40201                                                | 0 | 2 | 0.891244 |
| IPI00167645 | Hypothetical protein DKFZp761O1618                                           | 0 | 2 | 0.891244 |
| IPI00167941 | Midasin                                                                      | 0 | 2 | 0.891244 |
| IPI00168352 | Polyserase-2 precursor                                                       | 0 | 2 | 0.891244 |
| IPI00168603 | Choline dehydrogenase, mitochondrial                                         | 0 | 2 | 0.891244 |
| IPI00168708 | Hypothetical protein                                                         | 0 | 2 | 0.891244 |
| IPI00169065 | Olfactory receptor 4D5                                                       | 0 | 2 | 0.891244 |
| IPI00170770 | PHD finger protein 3                                                         | 0 | 2 | 0.891244 |
| IPI00170999 | NGEP long variant                                                            | 0 | 2 | 0.891244 |
| IPI00171230 | Splice Isoform 2 of RAB6 interacting protein                                 | 0 | 2 | 0.891244 |
| IPI00171491 | Splice Isoform 1 of Potassium voltage-gated channel subfamily H member 5     | 0 | 2 | 0.891244 |
| IPI00173359 | Uveal autoantigen                                                            | 0 | 2 | 0.891244 |
| IPI00175182 | PREDICTED: similar to hypothetical protein DKFZp727G131                      | 0 | 2 | 0.891244 |
| IPI00176782 | PREDICTED: KIAA1030 protein                                                  | 0 | 2 | 0.891244 |
| IPI00177938 | Splice Isoform 2 of Transducin-like enhancer protein 3                       | 0 | 2 | 0.891244 |

|             |                                                                   |   |   |          |
|-------------|-------------------------------------------------------------------|---|---|----------|
| IPI00184061 | Hypothetical protein FLJ34266                                     | 0 | 2 | 0.891244 |
| IPI00185919 | KIAA0731 protein                                                  | 0 | 2 | 0.891244 |
| IPI00187146 | PREDICTED: hypothetical protein                                   | 0 | 2 | 0.891244 |
| IPI00216438 | Solute carrier family 12 (Sodium/chloride transporterS), member 3 | 0 | 2 | 0.891244 |
| IPI00216992 | PREDICTED: KIAA2025 protein                                       | 0 | 2 | 0.891244 |
| IPI00217225 | Splice Isoform 1 of Nitric-oxide synthase, 107 kDa protein        | 0 | 2 | 0.891244 |
| IPI00217504 | Splice Isoform 2 of Sphingomyelin phosphodiesterase precursor     | 0 | 2 | 0.891244 |
| IPI00218784 | Splice Isoform 1 of Ryanodine receptor 1                          | 0 | 2 | 0.891244 |
| IPI00220391 | Zinc finger protein 628                                           | 0 | 2 | 0.891244 |
| IPI00254606 | Hypothetical protein FLJ16008                                     | 0 | 2 | 0.891244 |
| IPI00256434 | Hypothetical protein FLJ31675                                     | 0 | 2 | 0.891244 |
| IPI00289107 | Forkhead box protein O1A                                          | 0 | 2 | 0.891244 |
| IPI00289866 | Putative ATP-dependent mitochondrial RNA helicase                 | 0 | 2 | 0.891244 |
| IPI00293430 | Hypothetical protein                                              | 0 | 2 | 0.891244 |
| IPI00294705 | ZASP protein                                                      | 0 | 2 | 0.891244 |
| IPI00294959 | OTTHUMP00000044920                                                | 0 | 2 | 0.891244 |
| IPI00295816 | Hypothetical protein FLJ44660                                     | 0 | 2 | 0.891244 |
| IPI00295900 | A-kinase anchor protein 6                                         | 0 | 2 | 0.891244 |
| IPI00297089 | Hypothetical protein FLJ40073                                     | 0 | 2 | 0.891244 |
| IPI00297940 | PREDICTED: KIAA1107 protein                                       | 0 | 2 | 0.891244 |
| IPI00298902 | Splice Isoform 1 of B-cell lymphoma/leukemia 11A                  | 0 | 2 | 0.891244 |
| IPI00300332 | 14 kDa protein                                                    | 0 | 2 | 0.891244 |
| IPI00300420 | Solute carrier family 12, member 5                                | 0 | 2 | 0.891244 |
| IPI00301180 |                                                                   | 0 | 2 | 0.891244 |

|             |                                                                     |   |   |          |
|-------------|---------------------------------------------------------------------|---|---|----------|
| IPI00301360 | Splice Isoform 1 of Tumor protein p73-like                          | 0 | 2 | 0.891244 |
| IPI00302742 | FLJ11588 protein                                                    | 0 | 2 | 0.891244 |
| IPI00304379 | Ubiquitin carboxyl-terminal hydrolase 1                             | 0 | 2 | 0.891244 |
| IPI00304999 | Tyrosine-protein kinase transmembrane receptor ROR2 precursor       | 0 | 2 | 0.891244 |
| IPI00307230 | PREDICTED: similar to bA304I5.1 (novel lipase)                      | 0 | 2 | 0.891244 |
| IPI00307535 | Hypothetical protein FLJ32736                                       | 0 | 2 | 0.891244 |
| IPI00328089 | Immunodeficiency virus type I enhancer binding protein 3            | 0 | 2 | 0.891244 |
| IPI00328342 | Sodium bicarbonate cotransporter 3                                  | 0 | 2 | 0.891244 |
| IPI00328712 | Hypothetical protein MGC44505                                       | 0 | 2 | 0.891244 |
| IPI00329749 | RIN3                                                                | 0 | 2 | 0.891244 |
| IPI00332628 | Otopetrin 3                                                         | 0 | 2 | 0.891244 |
| IPI00333434 | Osteoclast stimulating factor 1                                     | 0 | 2 | 0.891244 |
| IPI00334320 | 48 kDa protein                                                      | 0 | 2 | 0.891244 |
| IPI00334799 | Splice Isoform 3 of Ryanodine receptor 1                            | 0 | 2 | 0.891244 |
| IPI00335085 | SPla/Ryanodine receptor SPRY domain containing protein              | 0 | 2 | 0.891244 |
| IPI00337314 | Hypothetical protein ALF                                            | 0 | 2 | 0.891244 |
| IPI00374930 | PREDICTED: hypothetical protein                                     | 0 | 2 | 0.891244 |
| IPI00375294 | Laminin alpha-1 chain precursor                                     | 0 | 2 | 0.891244 |
| IPI00375330 | FOE                                                                 | 0 | 2 | 0.891244 |
| IPI00377257 | Splice Isoform 3 of Phosphatase and actin regulator 3               | 0 | 2 | 0.891244 |
| IPI00382531 | HERV-K_5q33.3 provirus ancestral Pol                                | 0 | 2 | 0.891244 |
| IPI00384678 | Splice Isoform 2 of FYVE, RhoGEF and PH domain containing protein 2 | 0 | 2 | 0.891244 |

|             |                                                                                   |   |   |          |
|-------------|-----------------------------------------------------------------------------------|---|---|----------|
| IPI00385480 | 150 kDa protein                                                                   | 0 | 2 | 0.891244 |
| IPI00396063 | C-MYC promoter-binding protein IRLB                                               | 0 | 2 | 0.891244 |
| IPI00396314 | Hypothetical protein FLJ13165                                                     | 0 | 2 | 0.891244 |
| IPI00396394 | PREDICTED: similar to Munc13-3 protein -                                          | 0 | 2 | 0.891244 |
| IPI00396522 | ZNF614 protein                                                                    | 0 | 2 | 0.891244 |
| IPI00397645 | Hypothetical protein FLJ46603                                                     | 0 | 2 | 0.891244 |
| IPI00397675 | Formin homology 2 domain containing 3                                             | 0 | 2 | 0.891244 |
| IPI00398554 | PREDICTED: hypothetical protein                                                   | 0 | 2 | 0.891244 |
| IPI00398806 | H2A histone family, member V isoform 5                                            | 0 | 2 | 0.891244 |
| IPI00398898 | PREDICTED: similar to RIKEN cDNA<br>6430537H07 gene                               | 0 | 2 | 0.891244 |
| IPI00402594 | PREDICTED: hypothetical protein                                                   | 0 | 2 | 0.891244 |
| IPI00410571 | Protein exPRESSED in Prostate, ovary, testis,<br>and Placenta 14 isoform POTE-14B | 0 | 2 | 0.891244 |
| IPI00411343 | Hypothetical protein FLJ45651                                                     | 0 | 2 | 0.891244 |
| IPI00413518 | Splice Isoform 1 of Mirror-image polydactyly<br>gene 1 protein                    | 0 | 2 | 0.891244 |
| IPI00414612 | Hexokinase domain containing 1                                                    | 0 | 2 | 0.891244 |
| IPI00418957 | Hypothetical protein FLJ44653                                                     | 0 | 2 | 0.891244 |
| IPI00444602 | Hypothetical protein FLJ45082                                                     | 0 | 2 | 0.891244 |
| IPI00445315 | Family with sequence similarity 47, member                                        | 0 | 2 | 0.891244 |
| IPI00455219 | PREDICTED: AT rich interactive domain 5B<br>(MRF1-like)                           | 0 | 2 | 0.891244 |
| IPI00455508 | PREDICTED: similar to RIKEN cDNA<br>2610318N02                                    | 0 | 2 | 0.891244 |
| IPI00456069 | PREDICTED: hypothetical protein                                                   | 0 | 2 | 0.891244 |
| IPI00456336 | PREDICTED: hypothetical protein                                                   | 0 | 2 | 0.891244 |
| IPI00456341 | PREDICTED: hypothetical protein                                                   | 0 | 2 | 0.891244 |

|             |                                                            |      |      |          |
|-------------|------------------------------------------------------------|------|------|----------|
| IPI00456382 | PREDICTED: hypothetical protein                            | 0    | 2    | 0.891244 |
| IPI00464950 | Novel protein                                              | 0    | 2    | 0.891244 |
| IPI00465050 | LLGL2 protein                                              | 0    | 2    | 0.891244 |
| IPI00465164 | KIAA0194 protein                                           | 0    | 2    | 0.891244 |
| IPI00465325 | QVSK201                                                    | 0    | 2    | 0.891244 |
| IPI00470764 | Splice Isoform 6 of BAI1-associated protein                | 0    | 2    | 0.891244 |
| IPI00470771 | Hypothetical protein FLJ10211                              | 0    | 2    | 0.891244 |
| IPI00477179 | Hypothetical protein DKFZp686F21172                        | 0    | 2    | 0.891244 |
| IPI00478380 | 91 kDa protein                                             | 0    | 2    | 0.891244 |
| IPI00478870 | Hypothetical protein                                       | 0    | 2    | 0.891244 |
| IPI00514002 | Hypothetical protein DKFZp781J069                          | 0    | 2    | 0.891244 |
| IPI00549745 | Hypothetical protein DKFZp781M0415                         | 0    | 2    | 0.891244 |
| IPI00556076 | Mastermind-like 1 variant                                  | 0    | 2    | 0.891244 |
| IPI00556430 | Syntaxin 16 isoform a variant                              | 0    | 2    | 0.891244 |
| IPI00473097 | IGKC protein                                               | 4447 | 3940 | 0.892749 |
| IPI00430848 | IGKC protein                                               | 4443 | 3937 | 0.892848 |
| IPI00448845 | Hypothetical protein                                       | 4443 | 3937 | 0.892848 |
| IPI00549330 | Ig kappa chain C region                                    | 4443 | 3937 | 0.892848 |
| IPI00472961 | Hypothetical protein                                       | 4451 | 3944 | 0.894646 |
| IPI00152653 | Ciliary dynein heavy chain 5                               | 13   | 18   | 0.896825 |
| IPI00294810 | Hypothetical protein FLJ10824                              | 3    | 7    | 0.897715 |
| IPI00384399 | Myosin-reactive immunoglobulin light chain variable region | 3    | 7    | 0.897715 |
| IPI00430839 | Hypothetical protein                                       | 4442 | 3939 | 0.898795 |
| IPI00430847 | IGKC protein                                               | 4462 | 3958 | 0.902116 |
| IPI00007119 | Tubulin epsilon chain                                      | 1    | 4    | 0.904268 |
| IPI00023109 | Chromodomain-helicase-DNA-binding protein 2                | 1    | 4    | 0.904268 |

|             |                                                                                  |      |      |          |
|-------------|----------------------------------------------------------------------------------|------|------|----------|
| IPI00025178 | Breast carcinoma amplified sequence 2                                            | 1    | 4    | 0.904268 |
| IPI00152269 | WD repeat domain 51B                                                             | 1    | 4    | 0.904268 |
| IPI00382483 | Ig heavy chain V-III region GA                                                   | 1    | 4    | 0.904268 |
| IPI00022431 | Alpha-2-HS-glycoprotein precursor                                                | 186  | 172  | 0.908531 |
| IPI00026199 | Plasma glutathione peroxidase precursor                                          | 40   | 42   | 0.909852 |
| IPI00025864 | Cholinesterase precursor                                                         | 39   | 41   | 0.912875 |
| IPI00441043 | Hypothetical protein                                                             | 4449 | 3952 | 0.913242 |
| IPI00025862 | C4b-binding protein beta chain precursor                                         | 7    | 12   | 0.914465 |
| IPI00022395 | Complement component C9 precursor                                                | 115  | 112  | 0.920008 |
| IPI00011107 | Isocitrate dehydrogenase [NADP],<br>mitochondrial precursor                      | 2    | 6    | 0.921432 |
| IPI00457026 | PREDICTED: similar to GP80 precursor                                             | 2    | 6    | 0.921432 |
| IPI00022937 | Coagulation factor V                                                             | 13   | 19   | 0.923211 |
| IPI00550315 | Ig kappa chain C region                                                          | 4211 | 3750 | 0.923886 |
| IPI00166137 | RALY-like protein isoform 1                                                      | 9    | 15   | 0.924684 |
| IPI00479723 | Splice Isoform 10 of Fibronectin precursor                                       | 1911 | 1733 | 0.935153 |
| IPI00256861 | Splice Isoform 2 of Microtubule-actin<br>crosslinking factor 1, isoforms 1/2/3/5 | 3    | 8    | 0.93606  |
| IPI00292218 | Hepatocyte growth factor-like protein                                            | 3    | 8    | 0.93606  |
| IPI00432363 | Microtubule-actin crosslinking factor 1,<br>isoform 4                            | 3    | 8    | 0.93606  |
| IPI00479928 | 11 kDa protein                                                                   | 24   | 29   | 0.936767 |
| IPI00004656 | Beta-2-microglobulin precursor                                                   | 7    | 13   | 0.941067 |
| IPI00383105 | Chromodomain heliCase DNA binding                                                | 7    | 13   | 0.941067 |
| IPI00022418 | Splice Isoform 1 of Fibronectin precursor                                        | 1923 | 1752 | 0.942388 |
| IPI00010295 | Carboxypeptidase N catalytic chain precursor                                     | 21   | 27   | 0.945871 |
| IPI00414283 | Fibronectin 1 isoForm 4 preproprotein                                            | 1950 | 1786 | 0.946411 |
| IPI00009101 | Transcriptional activator SRCAP                                                  | 4    | 10   | 0.947817 |

|             |                                                                        |   |    |          |
|-------------|------------------------------------------------------------------------|---|----|----------|
| IPI00296437 | Type III iodothyronine deiodinase                                      | 4 | 10 | 0.947817 |
| IPI00167908 | Hypothetical protein FLJ35834                                          | 1 | 5  | 0.948036 |
| IPI00218130 | Glycogen phosphorylase, muscle form                                    | 1 | 5  | 0.948036 |
| IPI00329251 | Hypothetical protein MGC39581                                          | 1 | 5  | 0.948036 |
| IPI00480107 | 565 kDa protein                                                        | 1 | 5  | 0.948036 |
| IPI00004358 | Glycogen phosphorylase, brain form                                     | 0 | 3  | 0.949289 |
| IPI00005689 | KIAA1124 protein                                                       | 0 | 3  | 0.949289 |
| IPI00007362 | Ubiquitously transcribed X chromosome tetratricopeptide repeat protein | 0 | 3  | 0.949289 |
| IPI00007929 | FLJ20297 protein                                                       | 0 | 3  | 0.949289 |
| IPI00017386 | Hypothetical protein FLJ12704                                          | 0 | 3  | 0.949289 |
| IPI00018411 | PREDICTED: zinc finger protein 629                                     | 0 | 3  | 0.949289 |
| IPI00027310 | Multiple EGF-like-domain protein 4                                     | 0 | 3  | 0.949289 |
| IPI00027843 | Splice Isoform 1 of Vitamin K-dependent protein Z precursor            | 0 | 3  | 0.949289 |
| IPI00027848 | Macrophage mannose receptor precursor                                  | 0 | 3  | 0.949289 |
| IPI00168319 | Hypothetical protein FLJ90511                                          | 0 | 3  | 0.949289 |
| IPI00180408 | PREDICTED: KIAA1000 protein                                            | 0 | 3  | 0.949289 |
| IPI00183938 | Hypothetical protein FLJ20272                                          | 0 | 3  | 0.949289 |
| IPI00251559 | Ring finger protein 20                                                 | 0 | 3  | 0.949289 |
| IPI00294728 | X-like 1 protein                                                       | 0 | 3  | 0.949289 |
| IPI00298235 | Splice Isoform 1 of Protein O-mannosyl-transferase 1                   | 0 | 3  | 0.949289 |
| IPI00301143 | HGSC289                                                                | 0 | 3  | 0.949289 |
| IPI00301480 | 1-phosphatidylinositol-4,5-bisphosphate phosphodiesterase beta 2       | 0 | 3  | 0.949289 |
| IPI00304866 | Tumor necrosis factor, alpha-induced protein                           | 0 | 3  | 0.949289 |
| IPI00328211 | Novel protein                                                          | 0 | 3  | 0.949289 |

|             |                                                                  |      |      |          |
|-------------|------------------------------------------------------------------|------|------|----------|
| IPI00329038 | Splice Isoform 1 of CDK5 regulatory subunit associated protein 2 | 0    | 3    | 0.949289 |
| IPI00412869 | Similar to Kendrin                                               | 0    | 3    | 0.949289 |
| IPI00419263 | Peroxisomal 3,2-trans-enoyl-CoA isomerase                        | 0    | 3    | 0.949289 |
| IPI00465231 | Tolloid-like 2 protein                                           | 0    | 3    | 0.949289 |
| IPI00477896 | Anchor protein                                                   | 0    | 3    | 0.949289 |
| IPI00179357 | Titin                                                            | 6    | 12   | 0.949513 |
| IPI00375498 | TiTin isoform novex-1                                            | 6    | 12   | 0.949513 |
| IPI00017696 | Complement C1s subcomponent precursor                            | 73   | 76   | 0.951274 |
| IPI00041065 | HGF activator like protein                                       | 38   | 43   | 0.954146 |
| IPI00009028 | Tetranectin precursor                                            | 70   | 73   | 0.954708 |
| IPI00029168 | Apolipoprotein(a) precursor                                      | 68   | 71   | 0.957019 |
| IPI00455173 | Titin, heart isoform N2-B                                        | 5    | 11   | 0.957933 |
| IPI00011264 | Complement factor H-related protein 1 precursor                  | 114  | 116  | 0.958167 |
| IPI00296176 | Coagulation factor IX precursor                                  | 13   | 21   | 0.958288 |
| IPI00029863 | Alpha-2-antiplasmin precursor                                    | 174  | 168  | 0.95958  |
| IPI00022432 | Transthyretin precursor                                          | 1724 | 1572 | 0.960046 |
| IPI00019439 | Fibrillin 2 precursor                                            | 7    | 14   | 0.960086 |
| IPI00032220 | Angiotensinogen precursor                                        | 148  | 146  | 0.961239 |
| IPI00382577 | Kappa 1 light chain variable region                              | 20   | 27   | 0.961842 |
| IPI00303963 | Complement C2 precursor                                          | 44   | 50   | 0.962162 |
| IPI00470919 | Hypothetical protein DKFZp686K08164                              | 1862 | 1703 | 0.966769 |
| IPI00384402 | Myosin-reactive immunoglobulin kappa chain variable region       | 8    | 16   | 0.968507 |
| IPI00387116 | Ig kappa chain V-III region NG9 precursor                        | 8    | 16   | 0.968507 |
| IPI00298828 | Beta-2-glycoprotein I precursor                                  | 297  | 279  | 0.970555 |
| IPI00217444 | Splice Isoform 1 of Tripartite motif protein                     | 1    | 6    | 0.972262 |



|             |                                                                                |     |     |          |
|-------------|--------------------------------------------------------------------------------|-----|-----|----------|
| IPI00396231 | Glycosyltransferase                                                            | 1   | 6   | 0.972262 |
| IPI00429536 | HERV-K_22q11.23 provirus ancestral Gag polyprotein                             | 1   | 6   | 0.972262 |
| IPI00014845 | OTTHUMP00000039711                                                             | 7   | 15  | 0.973385 |
| IPI00377208 | Splice Isoform 1 Synonyms=a of Cadherin-like protein 26 precursor              | 2   | 8   | 0.973579 |
| IPI00398231 | PREDICTED: similar to Ig lambda light chain leader and V-region                | 2   | 8   | 0.973579 |
| IPI00166930 | 62 kDa protein                                                                 | 92  | 93  | 0.973596 |
| IPI00045510 | IAP-like protein 3                                                             | 12  | 21  | 0.97387  |
| IPI00163207 | Splice Isoform 1 of N-acetylmuramoyl-L-alanine amidase precursor               | 157 | 155 | 0.973997 |
| IPI00020996 | Insulin-like growth factor binding protein complex acid labile chain precursor | 73  | 79  | 0.97521  |
| IPI00382436 | Ig lambda chain V-III region SH                                                | 35  | 42  | 0.975214 |
| IPI00016334 | Cell surface glycoprotein MUC18 precursor                                      | 0   | 4   | 0.976357 |
| IPI00018136 | Splice Isoform 1 of Vascular cell adhesion protein 1 precursor                 | 0   | 4   | 0.976357 |
| IPI00021891 | Splice Isoform Gamma-B of Fibrinogen gamma chain precursor                     | 0   | 4   | 0.976357 |
| IPI00166161 | Hypothetical protein C14orf39                                                  | 0   | 4   | 0.976357 |
| IPI00242630 | Hypothetical protein FLJ20397                                                  | 0   | 4   | 0.976357 |
| IPI00382395 | Hypothetical protein FLJ31569                                                  | 0   | 4   | 0.976357 |
| IPI00470657 | Anti-colorectal carcinoma heavy chain                                          | 0   | 4   | 0.976357 |
| IPI00025204 | CD5 antigen-like precursor                                                     | 65  | 72  | 0.976714 |
| IPI00178926 | Immunoglobulin J chain                                                         | 13  | 23  | 0.978516 |
| IPI00165421 | SERPINC1 protein                                                               | 224 | 219 | 0.982537 |
| IPI00552385 | V2-17 protein                                                                  | 28  | 37  | 0.984023 |

|             |                                                                                    |      |      |          |
|-------------|------------------------------------------------------------------------------------|------|------|----------|
| IPI00383111 | Keratin 10                                                                         | 879  | 781  | 0.984423 |
| IPI00027482 | Corticosteroid-binding globulin precursor                                          | 27   | 36   | 0.985362 |
| IPI00410606 | Splice Isoform 1 of Transient receptor potential cation channel subfamily V member | 1    | 7    | 0.985381 |
| IPI00021439 | Actin, cytoplasmic 1                                                               | 6    | 15   | 0.986199 |
| IPI00464978 | Insulin receptor substrate 2 insertion mutant                                      | 6    | 15   | 0.986199 |
| IPI00032291 | Complement C5 precursor                                                            | 442  | 421  | 0.987074 |
| IPI00387120 | Ig kappa chain V-IV region Len                                                     | 88   | 93   | 0.988208 |
| IPI00386133 | Ig kappa chain V-IV region B17 precursor                                           | 47   | 57   | 0.988702 |
| IPI00024853 | Splice Isoform 1 of Periaxin                                                       | 0    | 5    | 0.988979 |
| IPI00166933 | Chromosome 10 open reading frame 12                                                | 0    | 5    | 0.988979 |
| IPI00398625 | Hornerin                                                                           | 0    | 5    | 0.988979 |
| IPI00184598 | 37 kDa protein                                                                     | 59   | 70   | 0.989875 |
| IPI00398874 | Similar to RIKEN cDNA 9230116B18 gene                                              | 12   | 24   | 0.99106  |
| IPI00159652 | PREDICTED: KIAA0826 protein                                                        | 6    | 16   | 0.991291 |
| IPI00299503 | Phosphatidylinositol-glycan-specific phospholipase D 1 precursor                   | 68   | 80   | 0.992149 |
| IPI00005826 | HERC2 protein                                                                      | 1    | 8    | 0.992372 |
| IPI00552852 | V2-19 protein                                                                      | 4    | 13   | 0.992476 |
| IPI00555746 | Paraoxonase 1                                                                      | 174  | 181  | 0.99314  |
| IPI00556287 | Hypothetical protein                                                               | 1575 | 1421 | 0.993546 |
| IPI00376383 | CENTRIOLIN                                                                         | 0    | 6    | 0.994863 |
| IPI00387109 | Ig kappa chain V-II region FR                                                      | 0    | 6    | 0.994863 |
| IPI00022426 | AMBP protein precursor                                                             | 210  | 217  | 0.995158 |
| IPI00218732 | Serum paraoxonase/arylesterase 1                                                   | 138  | 149  | 0.99561  |
| IPI00020986 | Lumican precursor                                                                  | 110  | 124  | 0.995877 |
| IPI00166729 | Alpha-2-glycoprotein 1, zinc                                                       | 109  | 123  | 0.996028 |
| IPI00009865 | Keratin, type I cytoskeletal 10                                                    | 1042 | 958  | 0.997029 |

|             |                                                                  |      |      |          |
|-------------|------------------------------------------------------------------|------|------|----------|
| IPI00375600 | Beta 3-glycosyltransferase-like                                  | 0    | 7    | 0.997606 |
| IPI00009920 | Complement component C6 precursor                                | 120  | 137  | 0.99773  |
| IPI00291866 | Plasma protease C1 inhibitor precursor                           | 411  | 410  | 0.998044 |
| IPI00300341 | Transcription elongation factor B polypeptide                    | 127  | 143  | 0.998078 |
| IPI00298853 | Vitamin D-binding protein precursor                              | 903  | 830  | 0.998331 |
| IPI00470901 | DeDicator of cytokinesis 5                                       | 4    | 16   | 0.99851  |
| IPI00006114 | Pigment epithelium-derived factor precursor                      | 133  | 150  | 0.998659 |
| IPI00013495 | Splice Isoform 2 of ATP-binding cassette, sub-family F, member 1 | 24   | 40   | 0.998924 |
| IPI00296170 | Haptoglobin-related protein                                      | 2007 | 1960 | 0.998954 |
| IPI00334362 | C114 SLIT-like testicular protein                                | 1    | 11   | 0.99896  |
| IPI00555812 | Vitamin D-binding protein variant                                | 914  | 846  | 0.998967 |
| IPI00019568 | Prothrombin precursor                                            | 537  | 535  | 0.999319 |
| IPI00470478 | Chromosome 17 open reading frame 27                              | 14   | 31   | 0.999325 |
| IPI00477597 | Haptoglobin-related protein precursor                            | 2145 | 2084 | 0.99947  |
| IPI00151141 | Splice Isoform 1 of Serine/threonine-protein kinase WNK4         | 0    | 9    | 0.99948  |
| IPI00551005 | Ig lambda chain C regions                                        | 7054 | 6437 | 0.999513 |
| IPI00387025 | Ig kappa chain V-I region DEE                                    | 3    | 16   | 0.999516 |
| IPI00550061 | Full-length cDNA clone CS0DI019YF20 of Placenta of Homo sapiens  | 3099 | 2921 | 0.999729 |
| IPI00549576 | Ig gamma-1 chain C region                                        | 8699 | 7917 | 0.99976  |
| IPI00305461 | Inter-alpha-trypsin inhibitor heavy chain H2 precursor           | 1113 | 1060 | 0.999849 |
| IPI00027235 | Splice Isoform 1 of Attractin precursor                          | 84   | 112  | 0.999939 |
| IPI00472345 | IGHG3 protein                                                    | 2919 | 2801 | 0.999973 |
| IPI00165972 | Adipsin/complement factor D precursor                            | 9    | 32   | 0.999976 |
| IPI00554766 | Hypothetical protein                                             | 2912 | 2799 | 0.99998  |

|             |                                                                            |       |      |          |
|-------------|----------------------------------------------------------------------------|-------|------|----------|
| IPI00023019 | Splice Isoform 1 of Sex hormone-binding globulin precursor                 | 5     | 27   | 0.999991 |
| IPI00026314 | Gelsolin precursor                                                         | 399   | 439  | 0.999992 |
| IPI00022463 | Serotransferrin precursor                                                  | 6993  | 6502 | 0.999994 |
| IPI00296537 | Splice Isoform C of Fibulin-1 precursor                                    | 48    | 84   | 0.999997 |
| IPI00382606 | Factor VII active site mutant                                              | 9405  | 8775 | 1        |
| IPI00296534 | Splice Isoform D of Fibulin-1 precursor                                    | 45    | 95   | 1        |
| IPI00383732 | VH3 protein                                                                | 365   | 445  | 1        |
| IPI00022371 | Histidine-rich glycoprotein precursor                                      | 210   | 280  | 1        |
| IPI00472610 | IGHM protein                                                               | 9856  | 9251 | 1        |
| IPI00448984 | Hypothetical protein                                                       | 9804  | 9208 | 1        |
| IPI00000357 | Activity-regulated cytoskeleton-associated protein                         | 4     | 41   | 1        |
| IPI00218192 | Splice Isoform 2 of Inter-alpha-trypsin inhibitor heavy chain H4 precursor | 540   | 634  | 1        |
| IPI00294193 | Splice Isoform 1 of Inter-alpha-trypsin inhibitor heavy chain H4 precursor | 540   | 635  | 1        |
| IPI00549769 | Ig gamma-1 chain C region                                                  | 10159 | 9642 | 1        |
| IPI00448925 | Hypothetical protein                                                       | 10195 | 9675 | 1        |
| IPI00549440 | Ig gamma-1 chain C region                                                  | 8685  | 8311 | 1        |
| IPI00423445 | Hypothetical protein DKFZp686P15220                                        | 10097 | 9594 | 1        |
| IPI00550438 | Ig gamma-1 chain C region                                                  | 10079 | 9592 | 1        |
| IPI00550647 | Ig gamma-1 chain C region                                                  | 10021 | 9540 | 1        |
| IPI00550945 | Ig gamma-1 chain C region                                                  | 10045 | 9572 | 1        |
| IPI00550509 | Ig gamma-1 chain C region                                                  | 10022 | 9551 | 1        |
| IPI00430840 | Hypothetical protein                                                       | 10036 | 9565 | 1        |
| IPI00550462 | Ig gamma-1 chain C region                                                  | 10026 | 9556 | 1        |
| IPI00550142 | Ig gamma-1 chain C region                                                  | 10023 | 9554 | 1        |

|             |                                                       |       |      |   |
|-------------|-------------------------------------------------------|-------|------|---|
| IPI00554615 | Anti-RhD monoclonal T125 gamma1 heavy chain precursor | 10020 | 9551 | 1 |
| IPI00550367 | Hypothetical protein DKFZp686I15196                   | 10012 | 9572 | 1 |
| IPI00439447 | Hypothetical protein                                  | 10011 | 9571 | 1 |
| IPI00549304 | Ig gamma-1 chain C region                             | 8873  | 8538 | 1 |
| IPI00384938 | Hypothetical protein DKFZp686N02209                   | 10010 | 9572 | 1 |
| IPI00426007 | Hypothetical protein DKFZp686G11190                   | 10079 | 9641 | 1 |
| IPI00423463 | Hypothetical protein DKFZp686O01196                   | 10056 | 9622 | 1 |
| IPI00304273 | Apolipoprotein A-IV precursor                         | 336   | 560  | 1 |
| IPI00423464 | Hypothetical protein DKFZp686K03196                   | 8134  | 8065 | 1 |
| IPI00478761 | 45 kDa protein                                        | 359   | 542  | 1 |
| IPI00549462 | Ig gamma-1 chain C region                             | 8902  | 8663 | 1 |
| IPI00550718 | Ig gamma-1 chain C region                             | 8147  | 8050 | 1 |

---
