# Supplementary material for: Localized-Statistical Quantification of Human Serum Proteome Associated with Type 2 Diabetes
Source: PubMed Central journal article supplement (PMC2529402; doi:10.1371/journal.pone.0003224), 2008-09-16
Supplement: pone.0003224.s008.pdf [file pone.0003224.s008.pdf]

### Supplementary Table S3

**Pathway analysis by mapping 1377 proteins into KEGG pathways. Ratio (%):  $(100 \times \text{Gene number found in pathway}) / \text{Totally gene number in pathway}$ . P value: present overall bias of pathways associated with diabetic-serum or non-diabetic serum.**

| <b>Pathway name</b>                        | <b>Gene number<br/>found in pathway</b> | <b>Totally gene number<br/>in pathway</b> | <b>Ratio<br/>(%)</b> | <b>Protein number<br/>found in pathway</b> | <b>P value</b> |
|--------------------------------------------|-----------------------------------------|-------------------------------------------|----------------------|--------------------------------------------|----------------|
| Notch signaling pathway                    | 3                                       | 46                                        | 6.521739             | 3                                          | 0.83108608     |
| Tryptophan metabolism                      | 4                                       | 80                                        | 5                    | 4                                          | 0.55440482     |
| Citrate cycle (TCA cycle)                  | 1                                       | 27                                        | 3.703704             | 1                                          | 0.92143184     |
| Dorso-ventral axis formation               | 1                                       | 28                                        | 3.571429             | 1                                          | 0.66528913     |
| Glycolysis / Gluconeogenesis               | 6                                       | 61                                        | 9.836066             | 6                                          | 0.26835121     |
| Phenylalanine metabolism                   | 2                                       | 28                                        | 7.142857             | 2                                          | 0.06058192     |
| Wnt signaling pathway                      | 8                                       | 145                                       | 5.517241             | 8                                          | 0.81577452     |
| gamma-Hexachlorocyclohexane<br>degradation | 2                                       | 24                                        | 8.333333             | 2                                          | 0.99270136     |
| Bisphenol A degradation                    | 2                                       | 13                                        | 15.38462             | 2                                          | 0.99270136     |
| PPAR signaling pathway                     | 10                                      | 67                                        | 14.92537             | 10                                         | 2.60E-08       |
| Tyrosine metabolism                        | 1                                       | 56                                        | 1.785714             | 1                                          | 0.25109763     |
| Histidine metabolism                       | 4                                       | 40                                        | 10                   | 4                                          | 0.18227911     |
| Chronic myeloid leukemia                   | 1                                       | 75                                        | 1.333333             | 1                                          | 0.37963333     |
| Acute myeloid leukemia                     | 1                                       | 51                                        | 1.960784             | 1                                          | 0.37963333     |
| Small cell lung cancer                     | 9                                       | 86                                        | 10.46512             | 12                                         | 0.98974253     |
| Arginine and proline metabolism            | 5                                       | 33                                        | 15.15152             | 5                                          | 0.74419946     |
| Non-small cell lung cancer                 | 2                                       | 53                                        | 3.773585             | 2                                          | 0.24472455     |
| Valine, leucine and isoleucine             | 3                                       | 44                                        | 6.818182             | 3                                          | 0.62723768     |
| Colorectal cancer                          | 6                                       | 85                                        | 7.058824             | 6                                          | 0.40297619     |

|                                          |    |     |          |    |            |
|------------------------------------------|----|-----|----------|----|------------|
| Renal cell carcinoma                     | 3  | 68  | 4.411765 | 3  | 0.93215142 |
| Pancreatic cancer                        | 2  | 73  | 2.739726 | 2  | 0.74386084 |
| Endometrial cancer                       | 2  | 51  | 3.921569 | 2  | 0.14123114 |
| Glioma                                   | 2  | 61  | 3.278689 | 2  | 0.74386084 |
| Methionine metabolism                    | 3  | 18  | 16.66667 | 3  | 0.85001952 |
| Prostate cancer                          | 4  | 86  | 4.651163 | 4  | 0.85991733 |
| Cysteine metabolism                      | 2  | 17  | 11.76471 | 2  | 0.80839113 |
| Thyroid cancer                           | 1  | 28  | 3.571429 | 1  | 0.25109763 |
| Basal cell carcinoma                     | 2  | 56  | 3.571429 | 2  | 0.09132949 |
| Melanoma                                 | 2  | 69  | 2.898551 | 2  | 0.74386084 |
| Bladder cancer                           | 2  | 39  | 5.128205 | 2  | 0.64401805 |
| Lysine degradation                       | 4  | 44  | 9.090909 | 4  | 0.77439014 |
| Glycine, serine and threonine metabolism | 4  | 43  | 9.302326 | 4  | 0.93501689 |
| Apoptosis                                | 6  | 84  | 7.142857 | 6  | 0.22443716 |
| Lysine biosynthesis                      | 1  | 3   | 33.33333 | 1  | 0.25109763 |
| Glutamate metabolism                     | 2  | 29  | 6.896552 | 2  | 0.52559162 |
| Alanine and aspartate metabolism         | 1  | 32  | 3.125    | 1  | 0.12664644 |
| Arachidonic acid metabolism              | 5  | 53  | 9.433962 | 5  | 0.98319126 |
| Gap junction                             | 3  | 93  | 3.225806 | 3  | 0.95130776 |
| Linoleic acid metabolism                 | 2  | 34  | 5.882353 | 2  | 0.74791995 |
| Pyrimidine metabolism                    | 2  | 87  | 2.298851 | 2  | 0.09987102 |
| Tight junction                           | 10 | 115 | 8.695652 | 10 | 0.9925035  |
| Purine metabolism                        | 3  | 142 | 2.112676 | 3  | 0.84457444 |
| Adherens junction                        | 7  | 73  | 9.589041 | 7  | 0.84327614 |
| Urea cycle and metabolism of amino       | 4  | 30  | 13.33333 | 4  | 0.47828646 |
| Focal adhesion                           | 27 | 191 | 14.13613 | 34 | 0.99897507 |
| Glycerolipid metabolism                  | 2  | 56  | 3.571429 | 2  | 0.366048   |

|                                                       |    |     |          |    |            |
|-------------------------------------------------------|----|-----|----------|----|------------|
| Inositol phosphate metabolism                         | 5  | 49  | 10.20408 | 5  | 0.41468817 |
| ECM-receptor interaction                              | 19 | 85  | 22.35294 | 23 | 0.7861081  |
| Glycosylphosphatidylinositol(GPI)-anchor biosynthesis | 1  | 23  | 4.347826 | 1  | 0.99214866 |
| Glycerophospholipid metabolism                        | 2  | 64  | 3.125    | 2  | 0.62764397 |
| Cell adhesion molecules (CAMs)                        | 7  | 122 | 5.737705 | 7  | 0.77963251 |
| Ether lipid metabolism                                | 1  | 29  | 3.448276 | 1  | 0.82757761 |
| Peptidoglycan biosynthesis                            | 1  | 2   | 50       | 1  | 0.97399713 |
| Glycosaminoglycan degradation                         | 2  | 15  | 13.33333 | 2  | 0.366048   |
| Heparan sulfate biosynthesis                          | 1  | 18  | 5.555556 | 1  | 0.12664644 |
| Neurodegenerative Disorders                           | 4  | 38  | 10.52632 | 4  | 0.00213209 |
| Streptomycin biosynthesis                             | 1  | 10  | 10       | 1  | 0.10218227 |
| Glutathione metabolism                                | 3  | 37  | 8.108108 | 3  | 0.90504689 |
| N-Glycan biosynthesis                                 | 2  | 36  | 5.555556 | 2  | 0.7489258  |
| N-Glycan degradation                                  | 1  | 15  | 6.666667 | 1  | 0.5        |
| Starch and sucrose metabolism                         | 8  | 81  | 9.876543 | 8  | 0.76818175 |
| Selenoamino acid metabolism                           | 2  | 29  | 6.896552 | 2  | 0.6544955  |
| Folate biosynthesis                                   | 5  | 39  | 12.82051 | 5  | 0.30271349 |
| Taste transduction                                    | 1  | 53  | 1.886792 | 1  | 0.94928867 |
| Cell Communication                                    | 43 | 130 | 33.07692 | 48 | 2.89E-05   |
| Biotin metabolism                                     | 1  | 4   | 25       | 1  | 0.63849762 |
| Long-term depression                                  | 8  | 74  | 10.81081 | 9  | 0.99957142 |
| Long-term potentiation                                | 5  | 66  | 7.575758 | 5  | 0.6970797  |
| Leukocyte transendothelial migration                  | 7  | 106 | 6.603774 | 7  | 0.98883247 |
| Circadian rhythm                                      | 1  | 12  | 8.333333 | 1  | 0.25109763 |
| T cell receptor signaling pathway                     | 4  | 91  | 4.395604 | 4  | 0.03705357 |
| B cell receptor signaling pathway                     | 3  | 62  | 4.83871  | 3  | 0.08035597 |
| Fc epsilon RI signaling pathway                       | 5  | 72  | 6.944444 | 5  | 0.62779054 |

|                                                            |   |     |          |   |            |
|------------------------------------------------------------|---|-----|----------|---|------------|
| beta-Alanine metabolism                                    | 2 | 25  | 8        | 2 | 0.5        |
| Natural killer cell mediated cytotoxicity                  | 5 | 124 | 4.032258 | 5 | 0.04805757 |
| Hematopoietic cell lineage                                 | 9 | 80  | 11.25    | 9 | 0.23274536 |
| Methane metabolism                                         | 1 | 9   | 11.11111 | 1 | 0.06414751 |
| Jak-STAT signaling pathway                                 | 5 | 148 | 3.378378 | 5 | 0.44010543 |
| Reductive carboxylate cycle (CO2                           | 1 | 10  | 10       | 1 | 0.92143184 |
| Toll-like receptor signaling pathway                       | 8 | 93  | 8.602151 | 8 | 0.1209601  |
| Carbon fixation                                            | 1 | 20  | 5        | 1 | 0.66528913 |
| Antigen processing and presentation                        | 2 | 68  | 2.941176 | 2 | 0.929892   |
| Renin-angiotensin system                                   | 2 | 17  | 11.76471 | 2 | 0.8175003  |
| Butanoate metabolism                                       | 1 | 43  | 2.325581 | 1 | 0.5        |
| Propanoate metabolism                                      | 3 | 34  | 8.823529 | 3 | 0.76175864 |
| mTOR signaling pathway                                     | 1 | 47  | 2.12766  | 1 | 0.37963333 |
| Type I diabetes mellitus                                   | 2 | 37  | 5.405405 | 2 | 0.33048645 |
| Benzoate degradation via CoA ligation                      | 1 | 26  | 3.846154 | 1 | 0.82757761 |
| Pathogenic Escherichia coli infection - EHEC               | 3 | 51  | 5.882353 | 3 | 0.66249115 |
| Pathogenic Escherichia coli infection - EPEC               | 3 | 51  | 5.882353 | 3 | 0.66249115 |
| Oxidative phosphorylation                                  | 2 | 126 | 1.587302 | 2 | 0.0402752  |
| Metabolism of xenobiotics by cytochrome P450               | 1 | 67  | 1.492537 | 1 | 0.5        |
| Type II diabetes mellitus                                  | 5 | 43  | 11.62791 | 5 | 0.54779228 |
| Pyruvate metabolism                                        | 2 | 41  | 4.878049 | 2 | 0.5        |
| Epithelial cell signaling in Helicobacter pylori infection | 2 | 68  | 2.941176 | 2 | 0.34420202 |
| SNARE interactions in vesicular                            | 2 | 36  | 5.555556 | 2 | 0.52559162 |

|                                                  |    |     |          |    |            |
|--------------------------------------------------|----|-----|----------|----|------------|
| Neuroactive ligand-receptor interaction          | 8  | 248 | 3.225806 | 8  | 0.92311608 |
| Aminoacyl-tRNA biosynthesis                      | 3  | 38  | 7.894737 | 3  | 0.10284719 |
| Adipocytokine signaling pathway                  | 8  | 71  | 11.26761 | 8  | 0.30336797 |
| Cholera - Infection                              | 1  | 40  | 2.5      | 1  | 0.0359066  |
| Prion disease                                    | 1  | 12  | 8.333333 | 1  | 0.12664644 |
| Ubiquitin mediated proteolysis                   | 3  | 43  | 6.976744 | 3  | 0.99992212 |
| Phosphatidylinositol signaling system            | 7  | 74  | 9.459459 | 7  | 0.35751101 |
| Insulin signaling pathway                        | 13 | 129 | 10.07752 | 13 | 0.99829598 |
| GnRH signaling pathway                           | 5  | 93  | 5.376344 | 5  | 0.98802619 |
| Sphingolipid metabolism                          | 2  | 37  | 5.405405 | 2  | 0.80839113 |
| Melanogenesis                                    | 5  | 99  | 5.050505 | 5  | 0.83742408 |
| Glycosphingolipid biosynthesis - neo-lactoseries | 1  | 20  | 5        | 1  | 0.31414323 |
| Glycosphingolipid biosynthesis - globoseries     | 1  | 14  | 7.142857 | 1  | 0.31414323 |
| Dentatorubropallidoluysian atrophy (DRPLA)       | 1  | 12  | 8.333333 | 1  | 0.89124382 |
| Glycosphingolipid biosynthesis - ganglioseries   | 1  | 15  | 6.666667 | 1  | 0.31414323 |
| Cell cycle                                       | 2  | 113 | 1.769912 | 2  | 0.74791995 |
| Cytokine-cytokine receptor interaction           | 7  | 245 | 2.857143 | 7  | 0.02268432 |
| p53 signaling pathway                            | 5  | 68  | 7.352941 | 5  | 0.70935122 |
| Huntington's disease                             | 2  | 29  | 6.896552 | 2  | 0.74791995 |
| Androgen and estrogen metabolism                 | 1  | 52  | 1.923077 | 1  | 0.5        |
| Phenylpropanoid biosynthesis                     | 1  | 7   | 14.28571 | 1  | 0.06414751 |
| Amyotrophic lateral sclerosis (ALS)              | 1  | 18  | 5.555556 | 1  | 0.25109763 |
| Ubiquinone biosynthesis                          | 1  | 15  | 6.666667 | 1  | 0.25109763 |

|                                      |    |     |          |    |            |
|--------------------------------------|----|-----|----------|----|------------|
| Alzheimer's disease                  | 6  | 27  | 22.22222 | 6  | 4.33E-15   |
| Bile acid biosynthesis               | 1  | 37  | 2.702703 | 1  | 0.5        |
| Calcium signaling pathway            | 13 | 171 | 7.602339 | 17 | 0.99677283 |
| Fatty acid metabolism                | 6  | 50  | 12       | 6  | 0.70097102 |
| Nitrogen metabolism                  | 4  | 22  | 18.18182 | 4  | 0.62386575 |
| DNA polymerase                       | 2  | 25  | 8        | 2  | 0.5        |
| Regulation of actin cytoskeleton     | 20 | 204 | 9.803922 | 26 | 0.9917139  |
| Porphyrin and chlorophyll metabolism | 1  | 40  | 2.5      | 1  | 0.00147661 |
| VEGF signaling pathway               | 4  | 69  | 5.797101 | 4  | 0.22891054 |
| MAPK signaling pathway               | 12 | 253 | 4.743083 | 12 | 0.27468745 |
| ErbB signaling pathway               | 2  | 86  | 2.325581 | 2  | 0.74386084 |
| Monoterpenoid biosynthesis           | 1  | 2   | 50       | 1  | 0.5        |
| Basal transcription factors          | 1  | 11  | 9.090909 | 1  | 0.69921902 |
| Limonene and pinene degradation      | 2  | 26  | 7.692308 | 2  | 0.5        |
| Axon guidance                        | 7  | 123 | 5.691057 | 7  | 0.14050907 |
| Fructose and mannose metabolism      | 2  | 39  | 5.128205 | 2  | 0.61863335 |
| Galactose metabolism                 | 2  | 29  | 6.896552 | 2  | 0.18473402 |
| Ascorbate and aldarate metabolism    | 1  | 9   | 11.11111 | 1  | 0.5        |
| TGF-beta signaling pathway           | 10 | 88  | 11.36364 | 10 | 0.82531451 |
| Glycan structures - biosynthesis 1   | 1  | 107 | 0.934579 | 1  | 0.66528913 |
| Glycan structures - biosynthesis 2   | 1  | 60  | 1.666667 | 1  | 0.31414323 |
| Glycan structures - degradation      | 3  | 27  | 11.11111 | 3  | 0.38992351 |
| Retinol metabolism                   | 1  | 4   | 25       | 1  | 0.5        |
| ABC transporters - General           | 2  | 44  | 4.545455 | 2  | 0.29474626 |
| Hedgehog signaling pathway           | 1  | 55  | 1.818182 | 1  | 0.82757761 |
| Pentose phosphate pathway            | 3  | 24  | 12.5     | 3  | 0.31338205 |
| Complement system                    | 23 | 32  |          | 25 | 1.45E-28   |
| coagulation cascades                 | 23 | 35  |          | 25 | 0.99141195 |

|                                     |    |    |          |    |          |
|-------------------------------------|----|----|----------|----|----------|
| Complement and coagulation cascades | 46 | 67 | 68.65672 | 50 | 1.27E-08 |
|-------------------------------------|----|----|----------|----|----------|

---
