# Supplementary material for: Localized-Statistical Quantification of Human Serum Proteome Associated with Type 2 Diabetes
Source: PubMed Central journal article supplement (PMC2529402; doi:10.1371/journal.pone.0003224), 2008-09-16
Supplement: pone.0003224.s009.pdf [file pone.0003224.s009.pdf]

## Supplementary Table S4

**General and clinical parameters of non-diabetic subjects and type 2 diabetic patients.** Sex: 1 = female, 2 = male, WT: weight (kg), FPG: fasting plasma glucose (mmol/L), PG2H: 2-hour plasma glucose (mmol/L), BMI: Body Mass Index, HOMA: The Homeostasis Model Assessment

| Diabetic patients | SEX | AGE | WT   | FPG   | PG2H  | BMI   | HOMA  | HbA1c | C-Peptide | With diabetes |
|-------------------|-----|-----|------|-------|-------|-------|-------|-------|-----------|---------------|
| 1                 | 2   | 53  | 88   | 10.82 | 19.08 | 28.09 | 2.48  | 13    | 2.38      | No            |
| 2                 | 2   | 57  | 60   | 14.86 | 7.13  | 20.28 | 3.24  | 8.9   | 0.37      | Yes           |
| 3                 | 1   | 61  | 58   | 6.35  | 13.1  | 23.83 | 3.43  | 6.1   | 0.76      | No            |
| 4                 | 1   | 38  | 65   | 23.7  | 20.1  | 26.37 | 13.88 | 10.3  | 1.77      | Yes           |
| 5                 | 1   | 50  | 66   | 7.21  | 7.78  | 26.44 | 2.58  | 6.5   | 3.01      | Yes           |
| 6                 | 2   | 42  | 68   | 9.9   | 19.99 | 23.26 | 3.37  | 10.4  | 1.41      | No            |
| 7                 | 1   | 43  | 65   | 7.46  | 10.34 | 25.08 | 2.82  | 8.5   | 1.26      | No            |
| 8                 | 2   | 36  | 58   | 12.24 | 17.74 | 20.07 | 5.52  | 11.5  | 2.03      | Yes           |
| 9                 | 1   | 51  | 70   | 10.33 | 11.59 | 28.4  | 4.87  | 8     | 1.86      | Yes           |
| 10                | 1   | 54  | 48   | 8.1   | 9.94  | 22.21 | 1.86  | 11    | 0.7       | No            |
| 11                | 2   | 62  | 64.5 | 8.87  | 14.47 | 23.13 | 2.09  | 9     | 2.49      | Yes           |
| 12                | 2   | 59  | 54   | 7.49  | 20.49 | 18.91 | 0.87  | 12.8  | 0.5       | Yes           |
| 13                | 1   | 60  | 65   | 11.2  | 13.6  | 23.88 | 6.23  | 8.7   | 1.4       | No            |
| 14                | 2   | 44  | 82.5 | 11.8  | 12.22 | 26.04 | 2.64  | 10.3  | 1.49      | No            |
| 15                | 1   | 66  | 62.5 | 11.75 | 14.54 | 29.32 | 6.1   | 9     | 2.61      | Yes           |
| 16                | 2   | 45  | 79   | 12.94 | 22.84 | 23.08 | 2.2   | 11.7  | 2         | No            |
| 17                | 2   | 55  | 65   | 13.77 | 14.74 | 23.03 | 5.9   | 10.4  | 1.2       | Yes           |
| 18                | 2   | 53  | 64   | 5.67  | 17.81 | 22.15 | 1.7   | 11.1  | 0.2       | Yes           |
| 19                | 1   | 54  | 66   | 8.17  | 15.49 | 27.12 | 4.66  | 12.9  | 0.4       | Yes           |
| 20                | 2   | 44  | 80   | 8.08  | 12.05 | 26.12 | 4.79  | 7.1   | 1.41      | No            |
| 21                | 1   | 56  | 60   | 7.29  | 8.76  | 24.34 | 3.64  | 6.3   | 1.13      | Yes           |

| 22                    | 2   | 60  | 63 | 7.3  | 9.9  | 21.05 | 3.52  | 6.6   | 2.3       | Yes |
|-----------------------|-----|-----|----|------|------|-------|-------|-------|-----------|-----|
| 23                    | 1   | 59  | 70 | 6.12 | 13.4 | 29.14 | 4.44  | 5.6   | 3.09      | No  |
| 24                    | 2   | 42  | 65 | 5.98 | 11.2 | 22.49 | 2.51  | 6.5   | 2.26      | Yes |
| Non-diabetic subjects | SEX | AGE | WT | FPG  | PG2H | BMI   | HOMA  | HbA1c | C-Peptide |     |
| 1                     | 2   | 38  | 62 | 4.5  | 3.5  | 21.71 | 1.68  | 5.1   | 0.32      | N.A |
| 2                     | 2   | 43  | 67 | 4.9  | 5.9  | 21.15 | 2.29  | 5.1   | 1.03      | N.A |
| 3                     | 1   | 50  | 56 | 5.06 | 5.39 | 20.57 | 3.06  | 5.3   | 1.44      | N.A |
| 4                     | 2   | 50  | 70 | 5.05 | 5.34 | 23.39 | 3.82  | 5     | 1.05      | N.A |
| 5                     | 1   | 47  | 65 | 5.42 | 5.86 | 24.17 | 3.67  | 5.5   | 2.12      | N.A |
| 6                     | 1   | 32  | 60 | 5    | 5.6  | 22.86 | 2.71  | 5.2   | 1.09      | N.A |
| 7                     | 2   | 57  | 75 | 5.24 | 7.41 | 24.49 | 4.46  | 6     | 2.84      | N.A |
| 8                     | 1   | 44  | 53 | 5.37 | 6.8  | 21.23 | 4.32  | 5.2   | 1.86      | N.A |
| 9                     | 2   | 42  | 65 | 4.4  | 5.85 | 21.97 | 2.14  | 5.2   | 1.41      | N.A |
| 10                    | 1   | 36  | 64 | 4.1  | 4.3  | 23.8  | 1.38  | 5.3   | 0.54      | N.A |
| 11                    | 1   | 32  | 60 | 5.18 | 6.42 | 22.86 | 2.57  | 5.3   | 1.1       | N.A |
| 12                    | 1   | 47  | 50 | 5.18 | 7.2  | 19.53 | 2.78  | 5.3   | 1.12      | N.A |
| 13                    | 1   | 42  | 55 | 5    | 7.23 | 22.31 | 2.55  | 5.2   | 1.42      | N.A |
| 14                    | 1   | 49  | 55 | 5.55 | 5.15 | 24.44 | 3.6   | 5     | 2.48      | N.A |
| 15                    | 1   | 53  | 50 | 5.55 | 6.93 | 23.78 | 3.22  | 5.1   | 0.85      | N.A |
| 16                    | 1   | 50  | 75 | 4.42 | 4.43 | 27.89 | 3.14  | 5.8   | 2.98      | N.A |
| 17                    | 2   | 55  | 75 | 5.05 | 5.76 | 25.95 | 11.16 | 5     | 0.98      | N.A |
| 18                    | 2   | 33  | 86 | 4.63 | 5.71 | 29.07 | 2.3   | 5.2   | 1.3       | N.A |
| 19                    | 2   | 46  | 61 | 4.87 | 3.94 | 21.61 | 2.58  | 5.2   | 1.02      | N.A |
| 20                    | 2   | 42  | 75 | 4.97 | 5.69 | 23.67 | 6.77  | 5.2   | 2.59      | N.A |
| 21                    | 2   | 40  | 70 | 5    | 5.06 | 24.22 | 5.28  | 5     | 2.21      | N.A |
| 22                    | 1   | 42  | 58 | 5    | 5.7  | 22.66 | 1.26  | 5     | 0.34      | N.A |
| 23                    | 2   | 49  | 75 | 5.1  | 5.6  | 23.41 | 1.41  | 5.4   | 0.25      | N.A |

|    |   |    |    |     |     |       |      |     |      |     |
|----|---|----|----|-----|-----|-------|------|-----|------|-----|
| 24 | 1 | 38 | 55 | 5.4 | 5.3 | 21.48 | 1.22 | 4.8 | 0.54 | N.A |
|----|---|----|----|-----|-----|-------|------|-----|------|-----|
